1 Title: Robust range of auditory periphery development, eye opening, and brain gene expression  
2 in Wistar rat pups that experience variation in maternal backgrounds.

3

4 Abbreviated title: Robust auditory system development in rat pups.

5

6 Authors: Jingyun Qiu<sup>1\*</sup>, Preethi Singh<sup>1\*</sup>, Geng Pan<sup>1\*</sup>, Annalisa de Paolis<sup>2</sup>, Frances A.  
7 Champagne<sup>3</sup>, Jia Liu<sup>4</sup>, Luis Cardoso<sup>2</sup> and Adrián Rodríguez-Contreras<sup>1,†</sup>.

8 <sup>1</sup>City University of New York, City College, Department of Biology and Center for Discovery  
9 and Innovation, New York, NY 10031.

10 <sup>2</sup>City University of New York, City College, Department of Biomedical Engineering, New York,  
11 NY 10031.

12 <sup>3</sup>University of Texas at Austin, Department of Psychology, Austin, TX 78712.

13 <sup>4</sup>City University of New York, Advanced Science Research Center at the Graduate Center,  
14 Neuroscience Initiative, New York, NY 10031.

15 \* These authors had equal contribution

16

17 Corresponding author: Adrián Rodríguez-Contreras

18 Email: [arodriguezcontreras@ccny.cuny.edu](mailto:arodriguezcontreras@ccny.cuny.edu)

19

20 Number of pages: 54

21 Number of figures: 9

22 Number of tables: 1

23 Number of words for abstract: 222

24 Number of words for introduction: 566

25 Number of words for discussion: 1454

26 Conflict of interest statement: The authors declare no competing financial interests

27 Acknowledgements: We would like to thank former lab members and students from Macaulay  
28 Honors Program Seminar 3 for discussions and help with behavioral scoring. Gene expression  
29 data was obtained and processed with help from the CUNY-ASRC Epigenetic Core facility staff.  
30 Supported by NIH grant SC1DC015907 and a CUNY ASRC-seed award.  
31  
32 Keywords: Maternal care; hearing onset; eye opening; *Bdnf*; Hif pathway.

33 ABSTRACT

34 The experience of variation in maternal licking and grooming (LG) is considered a critical  
35 influence in neurodevelopment related to stress and cognition, but little is known about its  
36 relationship to early sensory development. In this study, we used a maternal selection approach  
37 to test the hypothesis that differences in LG during the first week of life influence the timing of  
38 hearing onset in Wistar rat pups. We performed a range of tests, including auditory brainstem  
39 responses (ABR), tracking of eye opening (EO), micro-CT X-ray tomography, and qRT-PCR to  
40 monitor neurodevelopmental changes in the female and male progeny of low-LG and high-LG  
41 dams. Our results show that variation in maternal LG is not overtly associated with different  
42 timing of ABR onset and EO in the progeny. However, the data provide insight on the delay  
43 between hearing onset and EO, on key functional and structural properties that define hearing  
44 onset at the auditory periphery, and on changes in brain gene expression that include the first  
45 evidence that: a) the hypoxia-sensitive pathway is regulated in subcortical and cortical auditory  
46 brain regions before hearing onset, and b) implicates maternal LG in regulation of Bdnf signaling  
47 in auditory cortex after hearing onset. Altogether, these findings provide a baseline to evaluate  
48 how factors that severely disrupt the early maternal environment may affect the expression of  
49 robust developmental sensory programs.

50 SIGNIFICANCE STATEMENT

51 Early life experience during sensitive developmental periods can induce long-term effects on the  
52 neurobiological development of the offspring. In the present work we tested the hypothesis that  
53 variation in maternal licking and grooming (LG) affects the timing of hearing onset in Wistar rat  
54 pups. To our surprise the results did not support the hypothesis. Instead, we found a robust range  
55 of early and late auditory development that was independent of maternal LG. Nevertheless, the  
56 study provides new findings on the delay between hearing onset and eye opening, on key  
57 functional and structural properties that define hearing onset at the auditory periphery, and the  
58 first evidence that a) the hypoxia-sensitive pathway is regulated in the central auditory system  
59 during the sensitive period before hearing onset, and b) maternal LG is implicated in regulation  
60 of Bdnf signaling during the sensitive period after hearing onset. These findings provide a  
61 baseline to evaluate how factors that severely disrupt the early maternal environment may affect  
62 the expression of robust developmental sensory programs.

## 63 INTRODUCTION

64 In several mammalian species, including humans, maternal care is the main source of nutritional,  
65 social, and sensory stimulation that is important for survival and has the potential to impact the  
66 neurobiological development of the offspring (Curley and Champagne, 2016; González-Mariscal  
67 and Melo, 2017). Variation in rat postpartum maternal licking and grooming (LG) has been used  
68 as a model to select dams with individual differences in LG behavior and study the  
69 developmental re-programming of the offspring's adult stress response (Liu et al., 1997; Francis  
70 et al., 1999; Weaver et al., 2004; Hancock et al., 2005; Barha et al., 2007; Menard and Hakvoort,  
71 2007; Parent and Meaney, 2008; Walker et al., 2008; Cameron et al., 2008; Sakhai et al., 2011).  
72 However, characterization of the effects of the rearing experiences provided by dams with  
73 different LG phenotypes is incomplete, particularly with respect to how maternal LG may affect  
74 sensory development of the offspring during sensitive periods of early postnatal development,  
75 when various environmental challenges can severely disrupt mother infant interactions, reduce  
76 the chances of survival, and cause severe long-term neurobiological deficits in the progeny  
77 (Salmaso et al., 2014; Careaga, Murai and Bauman, 2017).

78

79 In a previous study, Adise *et al.* (2014) showed that a 15-minute separation followed by return to  
80 the biological or a foster mother accelerated auditory periphery development in Wistar rat pups.  
81 The effects were stronger when pups were manipulated at postnatal day 5 (P5), and weaker when  
82 pups were manipulated at P1 or P9, suggesting that the effects of maternal separation on auditory  
83 development were restricted to a sensitive period of postnatal development that occurs one week  
84 before the onset of hearing in this species. However, the contributing factors from the maternal  
85 environment, such as specific changes in maternal behavior or physiology were not identified.

86

87 In the present study, we tested the hypothesis that variation in maternal LG during the first week  
88 of life is associated with differences in the timing of hearing onset in Wistar rat pups. This idea is

89 motivated by previous findings that maternal LG is increased in adoptive Wistar rat dams  
90 (Maccari et al., 1995), and that massage treatment during the sensitive period before eye opening  
91 (EO) accelerates development of visually evoked potentials in Long-Evans rats (Guzzeta et al.,  
92 2009). If the frequency of maternal LG influences the timing of hearing onset in the offspring,  
93 then pups within a given litter would have an early or late hearing onset that correlates with the  
94 LG phenotype of their mother (Figure 1A). To determine the relationship between maternal LG  
95 and neurodevelopmental changes in the progeny, we performed tests of auditory brainstem  
96 response (ABR), tracking of eye opening (EO), imaging development of the middle ear cavity  
97 using micro-CT X-ray tomography, and monitored changes in gene expression in auditory  
98 brainstem and primary sensory cortex of pups reared by low-LG or high-LG dams (Figure 1B-  
99 D). Contrary to our expectations, the results show that variation in maternal LG is not overtly  
100 associated with different timing of ABR onset and EO in the progeny. Nevertheless, the data  
101 provide insight on the delay between hearing onset and EO, on key functional and structural  
102 properties that define hearing onset at the auditory periphery, and the first evidence that genes of  
103 the hypoxia-sensitive pathway and Bdnf signaling are regulated during sensitive periods that  
104 occur before and after hearing onset, respectively, in Wistar rat pups.

## 105 METHODS

### 106 *Experimental Design and Statistical Analyses*

107 Four maternal selection experiments were performed during the spring and fall seasons of two  
108 consecutive years (two experiments per year). For every selection experiment a cohort of 20  
109 male and 40 female Wistar rats at postnatal day 65 was obtained from a commercial supplier  
110 (Charles River). From 160 females used in the study, a total of 137 had successful pregnancies  
111 (range of 32 to 36 dams per cohort). A total of 199 pups from 17 selected litters were used for  
112 developmental tracking. These included 81 pups from 7 low-LG litters (36 females and 45  
113 males) and 118 pups from 10 high-LG litters (68 females and 50 males). Low-LG litters had an  
114 average of  $12 \pm 3$  pups (mean  $\pm$  SD; range 6 to 16 pups; n=7 litters). High-LG litters had an  
115 average of  $12 \pm 3$  pups (mean  $\pm$  SD; range 6 to 16 pups; n=10 litters). In addition, a total of 56  
116 pups from four litters were used for correlative ABR and micro-CT measurements. These  
117 included 27 pups from two low-LG litters (11 females and 14 males) and 29 pups from two high-  
118 LG litters (11 females and 18 males) that were obtained from the first and fourth cohorts (one  
119 low-LG litter and one high-LG litter from each cohort). The expression of 30 genes implicated in  
120 the development and physiology of neuronal, glial and vascular cells in brainstem and cortical  
121 brain regions was examined with qRT-PCR in a total of 21 pups from either sex obtained from  
122 spring cohorts. Target genes were analyzed in three broad groups: a) neurotrophins, transcription  
123 factors and signaling effectors; b) oligodendrocyte development, hypoxia-sensitive pathway and  
124 mTor/Wnt signaling; and c) membrane transport. We compared 4 developmental stages  
125 comprising birth (P0; n=3 pups, each from different litters); the end of the first postnatal week at  
126 P7 (n=3 low-LG pups from two litters, and 3 high-LG pups from one litter); the end of the  
127 second postnatal week at P15 (n=3 low-LG pups from two litters, and 3 high-LG pups from one  
128 litter); and the weaning age at P21 (n=3 low-LG pups, each from different litters, and 3 high-LG  
129 pups from two litters).

130

131 Unless indicated, data represent mean  $\pm$  SD. Statistical analyses were done with Prism 6 software  
132 (GraphPad). When appropriate, data sets were tested for normality using the D'Agostino and  
133 Pearson omnibus K2 test. Means in **Figure 2** were compared with an ordinary one-way ANOVA  
134 and the Holm-Sidak's multiple comparisons test (**Figure 2A**), or the Tukey's multiple  
135 comparisons test (**Figure 2D**). Medians in **Figure 3** were compared with the ANOVA Kruskal-  
136 Wallis test and the Dunn's multiple comparisons test (**Figure 3E and F**). Gene expression data  
137 was analyzed by ANOVA Kruskal-Wallis test and the Dunn's multiple comparisons test.  
138 Software built in algorithms for adjusting P values for multiple comparisons were used. Alpha =  
139 0.05 was used to denote significance when testing for statistical differences between means or  
140 medians.

141

#### 142 *Animal housing and breeding*

143 Experiments were performed in accordance with the Institutional Animal Care and Use  
144 Committee of the City College of New York. Rats were kept in a controlled environment at 22°C  
145 with an alternating 12 h light and dark cycle (lights were on at 7:00 hrs and off at 19:00 hrs).  
146 Water and food were available *ad libitum*. Male and female Wistar rats at postnatal day 65 were  
147 obtained from a commercial supplier (Charles River). Upon arrival, same sex rat pairs were  
148 housed in Plexiglas cages and acclimated to the animal care facility for one week. After  
149 acclimation, simple randomization with shuffled cage numbers was used to assign single males  
150 to a cage with a female pair. Breeding trios were housed together for five days. At the  
151 completion of the breeding period males were removed from the study and female pairs were  
152 housed together for 14 more days. Wistar rats have a gestation period of 22 days. Hence, 19 days  
153 after mating females were housed individually in Plexiglas cages that were supplied with paper  
154 towels as nesting material. Cages were checked for births everyday at 9:00 hrs, 12:00 hrs, and  
155 17:00 hrs. On the day of birth (P0), pups were weighted and dams and their litters were placed in  
156 clean Plexiglas cages. Females that were not pregnant were removed from the study. Cages were



157 undisturbed during behavioral scoring between P1 and P6, and routine twice per week cage  
158 cleaning resumed after behavioral scoring was finished. At P8, dams and their litters were  
159 transported to a satellite room for acclimation before testing.

160

### 161 *Maternal behavior scoring and selection criteria*

162 Methods for scoring maternal behavior and litter selection were adapted from a previous study  
163 (Champagne et al., 2003). In brief, five 1-hour maternal behavior observation sessions were  
164 performed daily at 6:00 hrs, 9:00 hrs, 13:00 hrs, 19:00 hrs, and 21:00 hrs between pup ages P1 to  
165 P6. Every 1-hour observation consisted of 3 minute-long bins where the following behaviors  
166 were scored if observed: no contact with pups, contact with pups, dam is drinking, dam is eating,  
167 dam is self-grooming, dam is nest building, dam is licking and grooming (LG) pups in the  
168 anogenital or body region, and various levels of arched-back nursing described previously  
169 (Champagne et al., 2003). Unless indicated, LG scores in this study represent the frequency of  
170 LG in 100 observations per day (60 observations in the light cycle and 40 observations in the  
171 dark cycle) expressed as percent LG per day, or as average percent LG obtained from six-day  
172 scores. For every cohort, LG histograms were generated and individual dams were selected if  
173 their six-day average LG score was 1 SD above (high-LG) or 1 SD below (low-LG) the six-day  
174 average LG score of their cohort. Dams and litters that were not selected were removed from the  
175 study.

176

### 177 *Developmental tracking*

178 Gender, body weight, onset of auditory brainstem responses (ABRs) and eye opening (EO) were  
179 tracked. Pup weight was recorded at P0, daily between P10 and P15, and at P21. Pup gender was  
180 determined between P10 and P15 using as joint criteria the anogenital distance and the presence  
181 or absence of multiple nipples to distinguish between males and females. EO was determined  
182 between P10 and P21, and was scored if at least one eyelid was open.

183

184 *Auditory brainstem response (ABR) tracking*

185 All ABR measurements were done blind to LG group. ABRs were obtained daily between P10  
186 and P15, and at P21. Anesthesia was induced inside a Plexiglas chamber with 3-5% isoflurane  
187 and maintained through a nose cone with 1.5% isoflurane dissolved in medical grade oxygen  
188 (gas flow set at 1 L min<sup>-1</sup>). ABRs were performed inside a double wall sound attenuated room  
189 (IAC). Anesthetized pups were placed onto a heating pad set at 37°C to keep them warm  
190 throughout the procedure. Subdermal electrodes were placed behind the right ear (reference  
191 electrode), at the vertex (active electrode), and at the left shoulder (ground electrode). A  
192 calibrated electrostatic Kanetec MB-FX free field speaker was used to deliver click sounds at 40  
193 Hz with intensities ranging from 102 to 2 dB sound pressure level (SPL) in 5 dB decrements.  
194 Clicks were synthesized with TDT system 3 hardware (Tucker-Davis Technologies), and  
195 presented at 20 kHz with alternating polarity to minimize the presence of stimulus artifacts.  
196 Speaker calibration was done with a type 7012 ½ inch ACO Pacific microphone (reference 20  
197 µPa). ABR waveforms were recorded with a Medusa preamplifier at 24.4 kHz and saved to hard  
198 disk for offline analysis (Tucker-Davis Technologies). ABRs in this study are average  
199 waveforms of 300 traces with 10 ms duration. ABR measurements per litter were completed in  
200 30-40 minutes, including the time it took for pups to recover from anesthesia. After recovery, all  
201 pups were placed back into their home cages until the next day of testing.

202

203 *Combined ABR and micro-CT X-ray tomography (micro-CT) experiments*

204 On the first day of experiments at P10, pups within a litter were labeled with permanent ink,  
205 sexed and processed for ABRs in pairs. After ABRs were measured, anesthetized pups were  
206 decapitated and their heads were processed fresh for micro-CT imaging. Micro-CT images were  
207 acquired and processed as described previously (Adise et al., 2014). X-Ray projections were

208 generated around the samples with 0.4° rotation steps at a resolution of 11.5  $\mu\text{m}$  per pixel using a  
209 1172 Bruker SkyScan (Bruker). Scans were loaded into MIMICS (v14.0, Materialise) for  
210 segmentation and 3D reconstruction. With the exception of the postalignment compensation, all  
211 reconstruction parameters were applied identically to all scans. Micro-CT imaging was  
212 performed blind to LG group. This procedure was repeated between P10 and P15 until all pups  
213 within a litter were used. For the low-LG and the high-LG litters obtained from the last selection  
214 experiment, all pups were screened for ABRs between P10 and P15 and pairs were removed  
215 daily for micro-CT imaging. This procedure allowed us to track ABRs between P12 and P13,  
216 when major changes in air volume of middle ear cavity and physiological responses were  
217 observed.

218

### 219 *Gene Expression*

220 qRT-PCR was performed with QuantStudio 7 Flex Real-time qPCR system (Thermofisher),  
221 using protocols available at the Advanced Science and Research Center Epigenetic Core Facility.  
222 Briefly, primer pairs were obtained from a commercial vendor (Sigma-Aldrich) and primer  
223 specificity was tested with adult rat whole-brain cDNA. **Table 1** shows the list of primers used in  
224 this study in the same order as they appear in **Figures 6, 7 and 8**. Total RNA was isolated from a  
225 bank of frozen brains kept at -80 °C using a RNA isolation kit according to the manufacturer's  
226 instructions (Qiagen). Frozen brain samples were thawed and dissected from 5 different regions:  
227 cochlear nucleus, pons (ventral brainstem containing the acoustic stria), inferior colliculus,  
228 temporal cortex (here referred as auditory cortex), and occipital cortex (here referred as visual  
229 cortex). Reverse transcription and specific target amplification were completed using qScript  
230 cDNA Supermix (Quanta) according to manufacturer's protocol. A primer mixture containing  
231 both forward and reverse primers was mixed with cDNA from different brain regions and loaded  
232 onto 384 well plates. The QuantStudio analysis software was used for data analysis and  
233 visualization. Threshold was determined automatically and Ct values were calculated using

234 QuantStudio analysis software. The housekeeping gene *Actb* (coding for  $\beta$ -actin) was measured  
235 for all ages and LG conditions tested using primers described in **Table 1**.

236

### 237 *Data Analysis*

238 ABR recordings were saved as text files and analyzed using NeuroMatic in Igor Pro software  
239 (WaveMetrics; Rothman and Silver, 2018). ABR thresholds were determined using an amplitude  
240 criterion to detect responses that were larger than four times the standard deviation (SD) of the  
241 baseline (Bogaerts et al., 2009). In general, waveforms with amplitudes larger than 1 microvolt  
242 were considered auditory responses. Wave I was defined as a positive transient voltage change  
243 with a peak latency of 1.8 ms to 2.2 ms. Short latency potentials (SLPs) were defined as positive  
244 transient voltage changes with a peak latency  $\sim$  1 ms.

245

246 Developmental curves of percent pups with a wave I response, EO, or air volume at different  
247 ages were fit to **Equation 1**:

248

$$249 \quad Y = Y_0 + (Y_{\max} - Y_0) / [1 + \exp(A_{50} - X/k)] \quad (1)$$

250

251 Where  $Y_0$  is the minimum observed  $Y$  (i.e., the percent pups with ABR, EO, or air volume),  
252  $Y_{\max}$  is the maximum observed  $Y$ ,  $A_{50}$  is the age at which  $Y$  is half maximum,  $X$  is age (in  
253 days), and  $k$  is the rate coefficient.

## 254 RESULTS

### 255 *Variation in maternal LG*

256 We used four Wistar rat cohorts from the spring and summer seasons of two consecutive years to  
257 select low-LG and high-LG dams, and we tracked the sensory development of their pup's  
258 between postnatal ages P10 and P21 (**Figure 1B**). **Figure 2A** shows box plots of maternal LG  
259 scores from the four cohorts used in this study. The six-day average LG score for each cohort  
260 was (mean  $\pm$  SD):  $9.8 \pm 1.8$  (n=36 dams, spring year 1);  $7.7 \pm 2.2$  (n=33 dams, summer year 1);  
261  $11.2 \pm 1.6$  (n=36 dams, spring year 2); and  $7.9 \pm 1.9$  (n=32 dams, summer year 2). Statistical  
262 analysis showed significant differences between mean LG scores (Ordinary one-way ANOVA,  
263  $F=25.91$ ,  $P<0.0001$ ), in particular between spring cohorts, and between spring and summer  
264 cohorts. Mean summer cohort LG scores were not significantly different from each other  
265 (determined by Tukey's multiple comparisons test; see **Figure 2** legend for P values). The large  
266 variability in LG scores across cohorts prompted us to examine the daily LG scores of the seven  
267 low-LG dams and the ten high-LG dams that were selected. Low-LG dams selected from spring  
268 cohorts showed daily LG profiles that started high and decreased during the six-day observation  
269 period (continuous lines in **Figure 2B**), while low-LG dams selected from summer cohorts  
270 showed relatively lower LG scores throughout the six-day observation period (dashed lines in  
271 **Figure 2B**). High-LG dams had daily LG scores that were very variable but stayed relatively  
272 high throughout the six-day observation period, regardless of whether they were obtained from  
273 the spring or summer cohorts (**Figure 2C**). Statistical analysis showed significant differences  
274 between the six-day average LG scores of selected dams (**Figure 2D**; ordinary one-way  
275 ANOVA,  $F=31.93$ ,  $P<0.0001$ ). We found that the average LG score of low-LG dams was higher  
276 in spring cohorts compared to summer cohorts (Tukey's multiple comparisons test,  $P=0.0035$ ).  
277 In contrast, we did not find statistically significant differences between the six-day average LG  
278 scores of high-LG dams from spring and summer cohorts (Tukey's multiple comparisons test,

279  $P=0.5672$ ). Overall, these results show that despite the variable LG scores between cohorts, the  
280 LG scores of selected low-LG and high-LG groups were significantly different from each other.  
281  
282 *Variation in auditory brainstem response (ABR) onset and eye opening (EO) in pups reared by*  
283 *low-LG and high-LG dams*  
284 ABRs and EO were tracked in a total of 81 pups from seven low-LG litters and in 118 pups from  
285 ten high-LG litters. For each litter the percent of pups with an ABR wave I, or the percent of  
286 pups with EO were plotted at different ages, and fits to **Equation 1** were obtained (**Figure 3A,**  
287 **B, C and D**; continuous lines represent fits to data from spring litters, dashed lines represent fits  
288 to data from summer litters). To examine the variation in ABR onset and EO within and across  
289 LG groups, the distributions of  $A_{50}$  values were compared (**Figure 3E**). This qualitative analysis  
290 showed skewed ABR  $A_{50}$  distributions for low-LG and high-LG litters, indicating that the  
291 majority of pups examined had early ABR onset between P11.5-P12. However, in some litters  
292 pups had ABR onset as late as P13-P13.5. EO  $A_{50}$  distributions for low-LG and high-LG litters  
293 were also skewed and covered a range of two days between P13 and P15. Statistical analysis  
294 showed significant differences between  $A_{50}$  medians (Kruskal-Wallis test,  $P$  value  $<0.0001$ ). A  
295 more detailed examination showed that the ABR  $A_{50}$  medians between low-LG and high-LG  
296 litters were not significantly different from each other (Dunn's multiple comparisons test, see  
297 **Figure 3** legend for  $P$  values). A similar result was obtained for EO  $A_{50}$  medians (Dunn's  
298 multiple comparisons test, see **Figure 3** legend for  $P$  values). However, the ABR  $A_{50}$  medians  
299 were significantly different from the EO  $A_{50}$  medians, within and across LG groups (indicated by  
300 asterisks in **Figure 3E**; Dunn's multiple comparisons test, see **Figure 3** legend for  $P$  values). To  
301 obtain information on the synchrony of development within litters, ABR and EO rate coefficient  
302  $k$  distributions were compared (see **Equation 1** and **Figure 3F**). The data shows evidence of  
303 predominately short values of rate coefficient  $k$  for low-LG and high-LG litters. Neither ABR  
304 rate coefficient  $k$  medians nor EO rate coefficient  $k$  medians showed significant differences

305 within and across LG groups (Kruskal-Wallis test,  $P$  value=0.1171). In sum, experiments  
306 described in **Figures 1B, 2, and 3** show that despite significant differences in LG scores between  
307 selected dams, ABR onset, timing of EO and synchrony of development do not differ between  
308 low-LG and high-LG litters. Instead, there is a range of litter-specific early or late times for ABR  
309 onset that happens during a two-day period. Similarly, a two-day range for early and late EO  
310 takes place sequentially after ABR onset.

311

312 *Maternal LG is not correlated with ABR onset or EO*

313 We used scatter plots of ABR  $A_{50}$  or EO  $A_{50}$  values against LG scores to determine the  
314 correlation coefficients between these two variables. We did not find evidence of a correlation  
315 between ABR  $A_{50}$  values and LG scores (non parametric Spearman correlation,  $R=-0.1063$ , two-  
316 tailed  $P=0.6823$ ), or between EO  $A_{50}$  values and LG scores (non parametric Spearman  
317 correlation  $R=-0.05184$ , two-tailed  $P=0.8434$ ). We also checked for systematic differences in the  
318 growth of pups reared by low-LG and high-LG dams. We compared average pup body weight  
319 between females and males within a litter and across LG groups on the day of ABR onset  
320 (defined by the  $A_{50}$  parameter) or using the slope of the growth curve between P10 and P15  
321 (determined by linear regression of body weight data). This analysis showed that pup's body  
322 weight did not correlate with maternal LG scores. Similar results were obtained when we tested  
323 for developmental differences between male and female pups (data not shown). Overall, the data  
324 discussed in this section does not support a correlation between maternal LG scores and  
325 developmentally tracked features of male and female pups.

326

327 *Differences in the delay between ABR onset and EO in litters with early or late ABR onset*

328 Next, we examined ABR onset and EO data in scatter plots of EO  $A_{50}$  values plotted against  
329 ABR  $A_{50}$  values (**Figure 4A**). This analysis showed that in individual litters, ABR onset always  
330 happened before EO, and notably, it confirmed that for both, ABR and EO, there was a range of

331 early and late onset times that happened within a two-day window: while ABR onset was  
332 observed between P11.5 and P13.5, EO was observed between P13 and P15. Note that there was  
333 never a litter in which the age of EO coincided with the age of ABR onset. Instead, litters with  
334 the earliest ABR onset had more variable EO times than litters with late ABR onset. In litters  
335 with ABR onset around P11.5 and P12, we observed delays to EO from 1.5-days to 3.5-days. In  
336 contrast, in litters with late ABR onset at ~P13, there was a ~1.5-2 day delay to EO. This pattern  
337 was observed in low-LG and high-LG litters alike (**Figure 4A**). A similar comparison between  
338 EO and ABR rate coefficient  $k$  showed that in most litters ABR rate coefficient values were  
339  $<0.1$ , implying developmental synchrony within litters. In contrast, EO rate coefficients were  
340 more variable, implying developmental synchrony and asynchrony, respectively across different  
341 litters (**Figure 4B**).

342

343 *Relationship between the development of the middle ear and ABR thresholds in the progeny of*  
344 *low-LG and high-LG dams*

345 To obtain information about developmental structural changes in the auditory periphery of pups  
346 from low-LG and high-LG litters, four litters were used to perform correlative ABR and micro  
347 CT X-ray tomography (micro-CT) experiments (**Figure 1C**;  $n=51$  pups). Detailed examination  
348 of the 3D renderings generated from micro-CT data confirmed our previous finding that  
349 formation of the middle ear cavity precedes formation of the ear canal (**Figure 5A**; Adise et al.,  
350 2014). However, in contrast to previous studies, precursor zones or small air pockets were not  
351 observed. Instead, there were marked differences in the air volume of pups from different litters,  
352 particularly between P12 and P13 (**Figure 5B**). Fitting **Equation 1** to data in **Figure 5B** gave  
353  $A_{50}$  values that ranged from 11.8 days to 13.2 days ( $12.4 \pm 0.3$  days,  $n = 4$  litters), and rate  
354 coefficient  $k$  values that ranged from 0.28 to 0.47 ( $0.40 \pm 0.04$ ,  $n = 4$  litters). From the 51 pups  
355 used in micro-CT imaging experiments, we confirmed an ABR wave I in 25 pups between P12  
356 and P15, while 17 pups between ages P10 and P11, and 9 pups between ages P12 and P13 did



357 not show any evidence of ABR wave I (**Figure 5C**). Since the micro-CT imaging did not detect  
358 air in any of the 17 non-responsive (NR) pups examined between P10 and P11, we can infer that  
359 formation of an air-filled middle ear cavity is necessary for transmission of airborne pressure  
360 waves to the inner ear. Linear fitting of wave I threshold data versus air volume in the range  
361 between 25 mm<sup>3</sup> to 60 mm<sup>3</sup> gave a slope of -2.5 dB/mm<sup>3</sup>, showing that auditory thresholds are  
362 inversely proportional to air volume in the auditory periphery. However, the structural data also  
363 suggests that the presence of air in the middle ear may not be sufficient for proper sound  
364 transmission, since there were 7 animals with a measurable air volume in the middle ear at P12  
365 and P13 that did not show an ABR wave I (labeled non responsive, NR, in the boxed area of  
366 **Figure 5C**).

367  
368 To examine the possibility that a minimal air volume at the auditory periphery is necessary for  
369 the onset of ABRs, the ABR waveforms from all pups at P12 (n=10) and all pups at P13 (n=8)  
370 used in the combined ABR and micro-CT experiments were re-examined. To our surprise, seven  
371 P12 pups and six P13 pups with air volumes larger than 12 mm<sup>3</sup> had responses of comparable  
372 amplitude to wave I, but with a shorter latency. We refer to these events as short latency  
373 potentials (SLPs; **Figure 6**). **Figure 6D** shows exemplar ABR traces with SLPs at different click  
374 intensities in a P12 pup whose structural information is shown in **Figure 6C**. Note that in this  
375 example wave I was not present, determined by the absence of a positive potential with a latency  
376 ~2 ms. **Figure 6F** shows exemplar recordings from another P12 pup that had SLPs followed by  
377 wave I at different click intensities and whose structural data is shown in **Figure 6E**. Note that in  
378 this example a wave I was identified after the SLP at click intensities of 102 dB and 97 dB but  
379 not at lower intensities, demonstrating that the threshold for the SLP was lower than the  
380 threshold for wave I. Lastly, exemplar ABR traces are shown for a P12 pup with an air volume  
381 of zero in the middle ear. In this case SLPs and wave I were absent in response to the same click  
382 intensities probed for the other pups (**Figure 6A and B**). Based on these observations, we re-

383 examined all the ABR recordings from the 4 litters used in combined ABR and micro-CT  
384 experiments between P11 and P15 to corroborate the presence or absence of SLPs at different  
385 ages. We found evidence of SLPs at P12 (n = 7 pups) and P13 (n = 6 pups), but we did not find  
386 any evidence of SLPs at P11 (n= 8 pups), P14 (n = 8 pups) and P15 (n = 8 pups). **Figure 6G**  
387 plots the SLP thresholds as a function of air volume for all ten P12 and eight P13 pups used in  
388 the combined ABR and micro-CT experiments (**Figure 6G**, solid symbols). Note that there were  
389 four NR P12 pups whose air volumes were  $< 15 \text{ mm}^3$  and did not have SLPs or ABR wave I, and  
390 one P13 NR pup with an air volume of  $34 \text{ mm}^3$  that did not have a SLP but had an ABR wave I  
391 (P12 NR pups are enclosed together in a dashed box, and the P13 NR pup with wave I but  
392 without SLP is enclosed in a dashed box marked with an arrow in **Figure 6G**). Linear fitting of  
393 SLP threshold data versus air volume in the range between  $15 \text{ mm}^3$  to  $50 \text{ mm}^3$  gave a slope of -  
394  $0.3 \text{ dB/mm}^3$ . Altogether, these data support the view that a minimal air volume at the auditory  
395 periphery is necessary for airborne conduction of click sounds from the external ear to the inner  
396 ear. Next, we examined the relationship between SLPs and wave I responses.

397

398 *SLPs show hallmarks of sensory responses from the inner ear*

399 We hypothesized that SLPs may represent electrical responses in hair cells of the inner ear.  
400 Alternatively, SLPs could represent evoked potentials from a different sensory modality, such as  
401 somatosensory fibers activated by the pressure energy contained in click stimuli of high  
402 intensity. If SLPs were generated in hair cells of the inner ear, then we would expect that SLPs  
403 and wave I would show hallmarks of synaptic communication, including a defined delay  
404 between events. In addition, we would expect developmental changes in the thresholds and the  
405 delay between SLPs and wave I. We would not expect to see these hallmarks if SLPs were  
406 sensory responses independent from wave I. To test these predictions, we took advantage that six  
407 littermates from one low-LG litter and six littermates from another high-LG litter were not used  
408 for micro-CT scans at P12. We recorded ABRs and defined the co-occurrence of SLPs and wave

409 I, and examined how the threshold for SLPs changed with respect to the threshold of wave I  
410 between P12 and P13. We found that all six pups from the high-LG litter had SLPs but did not  
411 have a wave I (open blue triangles in **Figure 6H**). Interesting to us, five out of six pups from the  
412 low-LG litter had SLPs followed by a wave I, and one pup had SLPs without any evidence of  
413 wave I (open magenta triangles in **Figure 6H**). Counting all the pups used in combined ABR  
414 and micro-CT experiments and the subset of littermates used in ABR tracking we found that in  
415 low-LG litters at P12 there were 2 pups that did not have a SLP nor a wave I (**Figure 6H** box 2);  
416 1 pup had SLPs but not a wave I; 6 pups had SLPs with thresholds that were lower than their  
417 corresponding wave I thresholds; and 1 pup had SLPs with a threshold that was similar to its  
418 wave I threshold. In high-LG litters at P12 there was 1 pup without SLP and wave I; 10 pups had  
419 SLPs and no wave I (**Figure 6H** box 1); and 1 pup had SLPs with a threshold lower than its  
420 wave I threshold. Thus, based on this data, it seems that SLPs occur alone at P12, and when  
421 SLPs and wave I are observed together, SLPs have lower thresholds than wave I. In low-LG  
422 litters at P13, there were 3 pups that had SLPs with thresholds that were lower than wave I  
423 thresholds. In high-LG litters at P13, all 3 pups had SLPs with thresholds that were similar to  
424 their corresponding wave I thresholds. Thus, at P13, SLPs always co-occur with wave I and had  
425 higher or similar thresholds than wave I.

426

427 To examine the development of SLPs and wave I responses, we tracked the ABRs from P12 to  
428 P13 in the eight remaining littermates from the low-LG and high-LG litters (4 pups per litter).  
429 We found evidence of a decrease in wave I thresholds from P12 to P13 such that in 7 of 8 pups  
430 SLPs had thresholds that were similar to their corresponding wave I thresholds, and in one pup  
431 the wave I threshold was lower than its corresponding SLP threshold (asterisks in **Figure 6H**).  
432 This single observation raised the possibility that in this animal, SLPs were independent events  
433 of wave I events. To test the possibility that somatosensory fibers could be activated by the  
434 pressure wave energy of high intensity click stimuli, we injected the local anesthetic lidocaine

435 around the skin pad surrounding the pinna area in three P13 littermates used for ABR  
436 experiments. This manipulation did not affect the occurrence of SLPs in these animals,  
437 suggesting that skin stimulation by high intensity clicks does not generate SLPs (data not  
438 shown). Altogether, these results indicate that SLPs antecede the developmental expression of  
439 wave I responses (open symbols in **Figure 6H**) and suggest that as pups mature, wave I  
440 thresholds decrease to match SLP thresholds.

441

442 Lastly, we obtained estimates of two physiological parameters of SLPs: the latency of events  
443 from stimulus onset, and the delay between the peaks of SLP's and wave I events at P12 and  
444 P13. The latency from stimulus onset was evaluated from ABR traces at different intensities  
445 ranging between 77 dB and 102 dB. We did not find systematic changes in this parameter as a  
446 function of click intensity at P12 or P13, so we obtained an average SLP latency per pup from  
447 these combined measurements and obtained a grand average per LG group per age. At P12, the  
448 latency of SLPs was  $1.08 \pm 0.01$  ms in low-LG pups (n=8 pups) and  $1.09 \pm 0.01$  ms in high-LG  
449 pups (n=11 pups). At P13, the latency of SLPs was  $1.09 \pm 0.01$  ms in low-LG pups (n=7 pups)  
450 and  $1.07 \pm 0.01$  ms in high-LG pups (n=7 pups). The mean values of SLP latency for different  
451 LG groups and ages were not significantly different from each other (age  $P=0.6342$ ; LG group  
452  $P=0.6342$ ; interaction between age and LG group  $P=0.1598$ , 2 way ANOVA). At P12, the delay  
453 between the peaks of the SLP and wave I was  $1.01 \pm 0.03$  ms in low-LG pups (n=7 pups), and  
454 could not be determined in high-LG pups since they did not have a wave I at this age, or if they  
455 had a wave I it was not preceded by a SLP (boxed data point indicated with an arrow in **Figure**  
456 **6G and H**). At P13, the delay between the peaks of the SLP and wave I was  $1.03 \pm 0.03$  ms in  
457 low-LG pups (n=7 pups), and  $1.02 \pm 0.02$  ms in high-LG pups (n=7 pups). Altogether, data in  
458 **Figures 5 and 6** show the relationship between development of the auditory periphery and the  
459 type of sensorineural response recorded in the progeny of low-LG and high-LG pups. SLPs

460 predominated over wave I responses at P12, and gradually waned as wave I responses increased  
461 in amplitude at P13 and thereafter.

462

463 *Analysis of gene expression in the auditory brainstem, auditory cortex (ACX) and visual cortex*  
464 *(VCX) of pups reared by low-LG and high-LG dams*

465 A gene expression screen using qRT-PCR was carried out with pup tissue from five brain  
466 regions at four ages. We screened the relative mRNA expression levels of 30 genes involved in  
467 neuronal, glial and vascular physiology and development in samples from the cochlear nucleus  
468 (CN), the pons, the inferior colliculus (IC), the primary auditory cortex (ACX), and the primary  
469 visual cortex (VCX) from neonate pups at P0, P7, P15, and P21 (Figure 1C; n=3 pups per age  
470 per LG group). Gene expression data is expressed as fold change with respect to P0 and  
471 summarized in **Figures 7, 8 and 9**.

472

473 *Analysis of genes involved in developmental plasticity*

474 **Figure 7** shows results for 10 genes involved in developmental plasticity, including  
475 transcriptional regulation and signal transduction. **Figure 7A** shows expression profiles for  
476 neurotrophin genes *Bdnf* and *Ngf*, and *Ntrk2*, which codes for the Bdnf receptor TrkB. The  
477 relative levels of *Bdnf* mRNA in subcortical structures did not change between P0 and any other  
478 age examined (ordinary one-way ANOVA P=0.5135, P=0.5157, P=0.2458, for CN, pons, and  
479 IC, respectively). For cortical structures, there was a statistically significant increase in ACX and  
480 VCX of high-LG pups between P0 and P21 (ordinary one-way ANOVA P=0.0730, P=0.0175,  
481 for ACX and VCX, respectively; and multiple comparisons test P=0.0192 and P=0.0035, for  
482 ACX and VCX respectively). The relative levels of *Ngf* mRNA did not show statistically  
483 significant changes in subcortical structures between P0 and any other age examined (ordinary  
484 one-way ANOVA P=0.4500, P=0.4226, P=0.3039 for CN, pons and IC, respectively). However,  
485 *Ngf* mRNA levels showed a statistically significant increase in ACX and VCX of pups from both

486 LG groups between P0 and P21 (ordinary one-way ANOVA  $P=0.0001$  and  $P=0.0001$ , for ACX  
487 and VCX respectively; and multiple comparisons test  $P=0.0001$ ,  $P=0.0007$ , for low-LG and  
488 high-LG samples in ACX respectively;  $P=0.0001$ ,  $P=0.0007$ , for low-LG and high-LG samples  
489 in VCX, respectively). Similar to *Bdnf* and *Ngf* mRNAs, *Ntrk2* mRNA levels did not show  
490 changes in CN and pons between P0 and any other age examined (ordinary one-way ANOVA  
491  $P=0.5272$  and  $P=0.523$  for CN and pons, respectively). However, there was a significant increase  
492 of *Ntrk2* mRNA levels in the IC of high-LG pups between P0 and P15, and a significant increase  
493 of *Ntrk2* mRNA levels in the IC of low-LG pups between P0 and P21 (ordinary one-way  
494 ANOVA  $P=0.0324$ ; and multiple comparisons test  $P=0.0024$ ,  $P=0.0040$  for high-LG samples at  
495 P15 and low-LG samples at P21, respectively). *Ntrk2* mRNA levels showed statistically  
496 significant increases in ACX and VCX of low-LG and high-LG pups between P0 and P15, and  
497 between P0 and P21 (ordinary one-way ANOVA  $P=0.0004$  and  $P=0.0023$  for ACX and VCX,  
498 respectively; multiple comparisons  $P=0.0003$ ,  $P=0.0056$ , for low-LG and high-LG samples in  
499 ACX, respectively;  $P=0.0056$ ,  $P=0.0001$ , for low-LG and high-LG samples in VCX,  
500 respectively). It was noted that the relative levels of *Ntrk2* mRNA in the ACX were significantly  
501 different between low-LG and high-LG samples at P21 (boxed region in ACX *Ntrk2* panel of  
502 **Figure 7A**; multiple comparisons test  $P=0.0437$ ).

503

504 **Figure 7B** shows developmental expression profiles for transcription factors *Fos*, *Jun*, *Nfkb1*,  
505 and *Otx2*. In the auditory brainstem the relative level of expression of *Fos* mRNA showed a  
506 small increase in CN of low-LG and high-LG pups between P0 and P21 (one-way ANOVA  
507  $P=0.0032$ ; and multiple comparisons test  $P=0.0065$ ,  $P=0.0021$  for low-LG and high-LG  
508 samples, respectively). No significant changes in *Fos* mRNA were detected in pons between P0  
509 and any other age examined (one-way ANOVA  $P=0.2129$ ), while there was an increase in *Fos*  
510 mRNA in the IC of high-LG pups between P0 and P21 (one-way ANOVA  $P=0.0426$ ; and  
511 multiple comparisons test  $P=0.0115$ ). In contrast, *Fos* mRNA levels showed robust increases in

512 ACX of pups from both LG groups between P0 and P15 (one-way ANOVA  $P=0.0148$ ; and  
513 multiple comparisons test  $P=0.0060$ ,  $P=0.0485$ , for low-LG and high-LG samples, respectively),  
514 and between P0 and P21 (multiple comparisons test  $P=0.0201$ ,  $P=0.0360$ , for low-LG and high-  
515 LG samples, respectively). *Fos* mRNA levels increased in VCX of low-LG pups between P0 and  
516 P15 (one-way ANOVA  $P=0.0076$ ; multiple comparisons  $P=0.0411$ ), and in low-LG and high-LG  
517 pups between P0 and P21 (multiple comparisons test  $P=0.0029$ ,  $P=0.0119$ , for low-LG and high-  
518 LG samples, respectively). In the auditory brainstem, the relative level of expression of *Jun*  
519 mRNA showed an increase in the CN and IC of low-LG and high-LG pups between P0 and P21  
520 (one-way ANOVA  $P=0.0022$ ,  $P=0.0002$  for CN and IC, respectively; and multiple comparisons  
521 test  $P=0.0060$ ,  $P=0.0002$  for low-LG and high-LG CN samples, respectively; and  $P=0.0001$ ,  
522  $P=0.0012$  for low-LG and high-LG IC samples, respectively). In the pons, *Jun* mRNA levels  
523 increased in low-LG pups between P0 and P15 (one-way ANOVA  $P=0.0001$ ; and multiple  
524 comparisons test  $P=0.0246$ ), and in both LG groups between P0 and P21 (multiple comparisons  
525 test  $P=0.0001$ ,  $P=0.0001$  for low-LG and high-LG pons samples, respectively). *Jun* mRNA  
526 levels showed significant increases in the ACX of pups from both LG groups between P0 and  
527 P15 (one-way ANOVA  $P=0.0001$ ; and multiple comparisons test  $P=0.0106$ ,  $P=0.0030$ , for low-  
528 LG and high-LG samples, respectively), and between P0 and P21 (multiple comparisons test  
529  $P=0.0001$ ,  $P=0.0001$ , for low-LG and high-LG samples, respectively). *Jun* mRNA levels  
530 increased in VCX of low-LG pups between P0 and P15 (one-way ANOVA  $P=0.0101$ ; multiple  
531 comparisons  $P=0.0158$ ), and in low-LG and high-LG pups between P0 and P21 (multiple  
532 comparisons test  $P=0.0032$ ,  $P=0.0079$ , for low-LG and high-LG samples, respectively). The  
533 relative expression of *Nfkb1* mRNA did not change during development in the CN and pons  
534 (one-way ANOVA  $P=0.3487$ ,  $P=0.3995$ , for CN and pons, respectively). In the IC, *Nfkb1*  
535 mRNA levels showed a slight but significant decrease in high-LG pups between P0 and P7 (one-  
536 way ANOVA  $P=0.0001$ ; multiple comparisons test  $P=0.0100$ ), and an increase in low-LG pups  
537 between P0 and P21 (multiple comparisons  $P=0.0001$ ). The profile of *Nfkb1* mRNA expression

538 was similar in the ACX and VCX, where there was an increase in low-LG pups between P0 and  
539 P15 (one-way ANOVA  $P=0.0001$  and  $P=0.0001$  for ACX and VCX, respectively; multiple  
540 comparisons test  $P=0.0157$ ,  $P=0.0003$  for low-LG samples in ACX or VCX, respectively), and  
541 an increase in pups from both LG groups between P0 and P21 (multiple comparisons test  
542  $P=0.0001$ ,  $P=0.0001$ , for low-LG and high-LG in ACX, respectively; and  $P=0.0001$ ,  $P=0.0001$ ,  
543 for low-LG and high-LG in VCX, respectively). It was noted that the relative levels of *Nfkb1*  
544 mRNA in the ACX were significantly different between low-LG and high-LG samples at P21  
545 (boxed region in ACX *Nfkb1* panel of **Figure 6B**; multiple comparisons test  $P=0.0002$ ). Lastly,  
546 the relative levels of expression of *Otx2* mRNA did not change during development in any of the  
547 brain structures examined (multiple comparisons test;  $P=0.4064$ ,  $P=0.7841$ ,  $P=0.4302$ ,  $P=0.2075$ ,  
548  $P=0.4808$ , for CN, pons, IC, ACX and VCX, respectively).

549  
550 **Figure 7C** shows mRNA developmental expression profiles for three downstream signaling  
551 effectors: the kinases *Akt1* and *Akt2*, and *Sort1*, a protein involved in the transport of other  
552 proteins from intracellular membrane compartments to the plasma membrane. In the CN, the  
553 relative levels of expression of *Akt1* increased between P0 and P15 in high-LG pups (one-way  
554 ANOVA  $P=0.0107$ ; multiple comparisons test  $P=0.0003$ ). It was noted that the relative level of  
555 *Akt1* mRNA was significantly different between low-LG and high-LG groups at P15 (boxed  
556 region in CN *Akt1* panel in **Figure 7C**; multiple comparisons test  $P=0.0030$ ). In the CN, *Akt1*  
557 mRNA levels increased between P0 and P21 in both LG groups (multiple comparisons test  
558  $P=0.0252$ ,  $P=0.0101$  for low=LG and high-LG samples, respectively). The levels of *Akt1* mRNA  
559 did not change during development in pons, IC, ACX and VCX (one-way ANOVA  $P=0.589$ ,  
560  $P=0.71611$ ,  $P=0.2611$  and  $P=0.1680$  for pons, IC, ACX and VCX, respectively). In contrast to  
561 *Akt1* mRNA levels, the relative levels of *Akt2* mRNA increased in the CN, IC and VCX between  
562 P0 and P21 in both LG groups (one-way ANOVA  $P=0.0121$ ,  $P=0.0012$ ,  $P=0.0026$  for CN, IC  
563 and VCX, respectively; multiple comparisons  $P=0.0020$ ,  $P=0.0055$  for low-LG and high-LG



564 samples in CN;  $P=0.0004$ ,  $P=0.0015$ , for low-LG and high-LG samples in IC;  $P=0.0457$ ,  
565  $P=0.0049$ , for low-LG and high-LG samples in VCX, respectively). In the pons, *Akt2* mRNA  
566 levels did not change between P0 and any age examined (one-way ANOVA  $P=0.6949$ ). In the  
567 ACX, *Akt2* mRNA levels increased in high-LG pups between P0 and P15 (one-way ANOVA  
568  $P=0.0001$ ; multiple comparisons test  $P=0.0143$ ), and in both LG groups between P0 and P21  
569 (multiple comparisons test  $P=0.0001$ ,  $P=0.0001$ , for low-LG and high-LG groups, respectively).  
570 Lastly, the levels of *Sort1* mRNA in the CN, ACX and VCX showed increased levels in both LG  
571 groups between P0 and P15 (one-way ANOVA  $P=0.0001$ ,  $P=0.0001$ ,  $P=0.0001$ , for CN, ACX  
572 and VCX, respectively; multiple comparisons test  $P=0.0321$ ,  $P=0.0187$  for low-LG and high-LG  
573 samples in CN, respectively;  $P=0.0050$ ,  $P=0.0059$  for low-LG and high-LG samples in ACX,  
574 respectively; and  $P=0.0017$ ,  $P=0.0138$ , for low-LG and high-LG samples in VCX, respectively),  
575 and between P0 and P21 (multiple comparisons test  $P=0.0001$ ,  $P=0.0001$ , for low-LG and high-  
576 LG samples in CN, respectively;  $P=0.0001$ ,  $P=0.0001$ , for low-LG and high-LG samples in  
577 ACX, respectively; and  $P=0.0001$ ,  $P=0.0001$ , for low-LG and high-LG samples in VCX,  
578 respectively). In the pons and IC, the levels of *Sort1* mRNA increased in both LG groups  
579 between P0 and P21 (multiple comparisons test  $P=0.0001$ ,  $P<0.0001$ , for low-LG and high-LG  
580 samples in pons, respectively; and  $P=0.0224$ ,  $P=0.0002$ , for low and high-LG samples in IC,  
581 respectively). It was noted that mRNA levels in IC were statistically different between low-LG  
582 and high-LG samples at P21 (multiple comparisons test  $P=0.0329$ ).

583

584 In sum, the data in **Figure 7** shows evidence that genes involved in transcriptional regulation and  
585 signal transduction the context of developmental plasticity, increased expression levels in the  
586 ACX and VCX between P0 and P21, and to some extent between P0 and P15. Similar age-  
587 dependent expression profiles were observed in the CN and IC, but not consistently in the pons.  
588 Statistically significant differences between samples from pups of low-LG and high-LG litters

589 were observed in the ACX at P21 (*Ntrk2* and *Nfkb1*), in the CN at P15 (*Akt1*), and in the IC at  
590 P21 (*Sort1*).

591

592 *Analysis of genes involved in myelin development, the hypoxia-sensitive pathway and the Wnt7*  
593 *pathway*

594 **Figure 8** shows results for 10 genes that are involved in myelin development and two distinct  
595 signaling pathways. **Figure 8A** shows developmental expression profiles for *Olig2* and *Mbp*. In  
596 the CN, the relative levels of *Olig2* mRNA showed a significant increase in low-LG and high-LG  
597 samples between P0 and P21 (one-way ANOVA  $P=0.0250$ ; multiple comparisons test  $P=0.0066$ ,  
598  $P=0.0067$ , for low-LG and high-LG samples, respectively), but there were no significant  
599 differences observed in the pons, IC, ACX and VCX between P0 and any age tested (one-way  
600 ANOVA,  $P=0.4959$ ,  $P=0.7710$ ,  $P=0.5170$ ,  $P=0.3840$ , for pons, IC, ACX and VCX, respectively).  
601 The relative levels of *Mbp* mRNA showed an increase in the CN of low-LG pups between P0  
602 and P21 (one-way ANOVA  $P=0.0068$ ; multiple comparisons test  $P=0.0415$ ). In the pons, *Mbp*  
603 mRNA levels decreased significantly in low-LG pups between P0 and P15 (one-way ANOVA  
604  $P=0.3076$ ; multiple comparisons test  $P=0.0238$ ). In the IC, *Mbp* mRNA levels increased in high-  
605 LG pups between P0 and P21 (one-way ANOVA  $P=0.0073$ ; multiple comparisons test  
606  $P=0.0037$ ). In ACX and VCX, *Mbp* mRNA levels increased in low-LG and high-LG pups  
607 between P0 and P21 (one-way ANOVA  $P=0.0002$ ,  $P=0.0001$  for ACX and VCX, respectively;  
608 multiple comparisons test  $P=0.0003$ ,  $P=0.0004$ , for low-LG and high LG samples in ACX,  
609 respectively;  $P=0.0001$ ,  $P=0.0002$ , for low-LG and high LG samples in VCX, respectively).

610

611 **Figure 8B** shows developmental expression profiles for hypoxia-sensitive transcription factor  
612 genes *Hif1a* and *Epas1* (*Hif2a*), and for *Egln* (*Phd*) paralogues 1-3 which code proteins that  
613 regulate Hif1a and Hif2a degradation. In the CN, IC and VCX, the relative levels of *Hif1a*  
614 mRNA did not change between P0 and any age examined (one-way ANOVA  $P=0.4775$ ,

615 P=0.3494, P=0.0716 for CN, IC and VCX, respectively). In the pons and ACX, a significant  
616 increase in *Hif1a* mRNA levels was detected in high-LG pups between P0 and P21 (one-way  
617 ANOVA P=0.1645, P=0.0699 for pons and ACX, respectively; multiple comparisons test  
618 P=0.0171, P=0.0203 for high-LG samples in pons and VCX, respectively). In the CN, pons, IC,  
619 ACX and VCX, the relative levels of *Epas1* mRNA showed increases between P0 and P15 and  
620 between P0 and P21 (one-way ANOVA P=0.0165, P=0.0303, P=0.00174, P=0.0001, P=0.0001  
621 for CN, pons, IC, ACX and VCX, respectively). In the CN, an increase in *Epas1* mRNA in high-  
622 LG pups was observed between P0 and P15, while in the IC, an increase in low-LG pups  
623 between P0 and P15 was detected (multiple comparisons test P=0.0237, P=0.0092 for CN and  
624 IC, respectively). In the CN and IC, there was an increase of *Epas1* mRNA in both LG groups  
625 between P0 and P21 (multiple comparisons test P=0.0154, P=0.0119 for low-LG and high-LG  
626 samples in CN, respectively; P=0.0400, P=0.0021 for low-LG and high-LG samples in IC,  
627 respectively). In the pons, ACX, and VCX, an increase in *Epas1* mRNA was observed in both  
628 LG groups between P0 and P15 (multiple comparisons test P=0.0147, P=0.0105 for low-LG and  
629 high-LG pups in pons, respectively; P=0.0500, P=0.0104 for low-LG and high-LG pups in ACX,  
630 respectively; P=0.0006, P=0.0006 for low-LG and high-LG pups in VCX, respectively) and  
631 between P0 and P21 (multiple comparisons test P=0.0011, P=0.0003 for low-LG and high-LG  
632 pups in pons, respectively; P=0.0001, P=0.0001 for low-LG and high-LG pups in ACX,  
633 respectively; P=0.0002, P=0.0001 for low-LG and high-LG pups in VCX, respectively). The  
634 developmental expression profile of *Egln2* (*Phd1*) mRNA was heterogeneous. In the CN, there  
635 was a significant increase in low-LG and high-LG groups between P0 and P21 (one-way  
636 ANOVA P=0.1932; multiple comparisons test P=0.0303, P=0.0479 for low-LG and high-LG  
637 pups, respectively). In the pons and IC, there were no changes detected in *Egln2* mRNA levels  
638 between P0 and any age examined (one-way ANOVA P=0.9052, P=0.9349 for pons and IC,  
639 respectively). In the ACX, there were increases in *Egln2* mRNA of high-LG pups between P0  
640 and P7 (one-way ANOVA P=0.0976, multiple comparisons test P=0.0351), and in both LG

641 groups between P0 and P15 (multiple comparisons test  $P=0.0202$ ,  $P=0.0096$ ). In the VCX, there  
642 were increases in *Egln2* mRNA in both LG groups between P0 and P15 (one-way ANOVA  
643  $P=0.0599$ ; multiple comparisons test  $P=0.0205$ ,  $P=0.0055$ ). The developmental expression  
644 profile of *Egln1* (*Phd2*) mRNA levels was the first to show consistent changes between P0 and  
645 P7 across different brain regions. In the CN and ACX, there were decreases in *Egln1* mRNA  
646 levels in both LG groups between P0 and P7 (One-way ANOVA  $P=0.0001$ ,  $P=0.0001$ ; multiple  
647 comparisons test  $P=0.0050$ ,  $P=0.0240$ , for low and high-LG samples in CN;  $P=0.0163$ ,  $P=0.0066$   
648 for low-LG and high-LG samples in ACX), and in both LG groups between P0 and P15  
649 (multiple comparisons test  $P=0.0084$ ,  $P=0.0098$  for low-LG and high-LG samples in CN;  
650  $P=0.0119$ ,  $P=0.0080$  for low-LG and high-LG samples in ACX). In the CN and ACX, there were  
651 increases in *Egln1* mRNA levels in both LG groups between P0 and P21 (multiple comparisons  
652 test  $P=0.0156$ ,  $P=0.0078$  for low-LG and high-LG samples in CN;  $P=0.0001$ ,  $P=0.0001$  for low-  
653 LG and high-LG samples in ACX). In the pons, there was a decrease in *Egln1* mRNA levels in  
654 low-LG samples between P0 and P7 (one-way ANOVA  $P=0.0262$ ; multiple comparisons test  
655  $P=0.0452$ ). In the IC, there were decreases in *Egln1* mRNA levels in both LG groups between P0  
656 and P7 (one-way ANOVA  $P=0.0001$ ; multiple comparisons test  $P=0.0267$ ,  $P=0.0357$ ), in high-  
657 LG pups between P0 and P15 (multiple comparisons  $P=0.0334$ ), and increases in both LG  
658 groups between P0 and P21 (multiple comparisons  $P=0.0004$ ,  $P=0.0005$  for low-LG and high-  
659 LG samples respectively). Lastly, in the VCX there were increases in *Egln1* mRNA levels in  
660 both LG groups only between P0 and P21 (one-way ANOVA  $P=0.0001$ ; multiple comparisons  
661 test  $P=0.0009$ ,  $P=0.0007$  for low-LG and high-LG samples, respectively). The developmental  
662 expression profile of *Egln3* (*Phd3*) mRNA in the CN, pons, and VCX, showed increases in both  
663 LG groups between P0 and P21 (one-way ANOVA  $P=0.0001$ ,  $P=0.0001$ ,  $P=0.0003$  in CN, pons  
664 and VCX, respectively; multiple comparisons test  $P=0.0008$ ,  $P=0.0001$  for low-LG and high-  
665 LG samples in CN, respectively;  $P=0.0009$ ,  $P=0.0001$  for low-LG and high-LG samples in pons,  
666 respectively;  $P=0.0016$ ,  $P=0.0020$  for low-LG and high-LG samples in VCX, respectively). In

667 the IC, there were no significant changes in *Egln3* mRNA between P0 and any age examined  
668 (multiple comparisons test all P values>0.05). In the ACX, there was an increase in *Egln3*  
669 mRNA levels between P0 and P21 in ACX of low-LG samples (multiple comparisons test  
670 P=0.0260).

671

672 **Figure 8C** shows developmental expression profiles for the kinase *Mtor*, and secreted signaling  
673 protein isoforms *Wnt7a* and *Wnt7b*. The relative levels of *Mtor* mRNA in the CN and pons did  
674 not change between P0 and any age tested (one-way ANOVA P=0.2815, P=0.7722 for CN and  
675 pons, respectively). In the IC and ACX, there were increases in both LG groups between P0 and  
676 P21 (one-way ANOVA P=0.1119, P=0.0056 for IC and ACX, respectively; multiple  
677 comparisons test P=0.0334, P=0.0210 for low-LG and high-LG groups in IC, respectively;  
678 P=0.0056, P=0.0005 for low-LG and high-LG groups in ACX, respectively). Lastly, in the VCX,  
679 there were increases in high-LG pups between P0 and P15 (one-way ANOVA P=0.0015;  
680 multiple comparisons test P=0.0057), and in both LG groups between P0 and P21 (multiple  
681 comparisons test P=0.0012, P=0.0007 for low-LG and high-LG samples, respectively). The  
682 developmental profile of *Wnt7a* mRNA in the CN, pons, and VCX, did not show any changes  
683 between P0 and any age examined (one-way ANOVA P=0.0682, P=0.5819, P=0.1640 for CN,  
684 pons and VCX, respectively). In the IC, there was an increase in *Wnt7a* mRNA in low-LG pups  
685 between P0 and P21 (one-way ANOVA P=0.0125; multiple comparisons test P=0.0023), and in  
686 the ACX, there were increases in *Wnt7a* mRNA in both LG groups between P0 and P21 (one-  
687 way ANOVA P=0.0153; multiple comparisons test P=0.0102, P=0.0059 for low-LG and high-  
688 LG samples, respectively). Lastly, there were no changes in *Wnt7b* mRNA levels between P0  
689 and any age tested in any of the brain regions tested (one-way ANOVA P=0.1389, P=0.2215,  
690 P=0.2004, P=0.4577, P=0.6010 for CN, pons, IC, ACX and VCX, respectively).

691

692 In sum, the data in **Figure 8** shows evidence that genes involved in myelin development and two  
693 signaling pathways, the hypoxia-sensitive pathway and the *Mtor/Wnt7* pathway, showed  
694 heterogeneous changes, increasing between P0 and P15, between P0 and P21, or remaining  
695 constant throughout the ages examined. It is notable that mRNA levels for *Egln1* showed a  
696 decrease between P0 and P7, and between P0 and P15 in most auditory brain regions examined,  
697 but not in the VCX.

698

699 *Analysis of genes involved in cell signaling, water diffusion, and ion diffusion*

700 **Figure 9** shows the developmental profiles of mRNAs coding for diverse membrane proteins  
701 involved in cell signaling, water, and ion diffusion. **Figure 8A** shows developmental profiles for  
702 genes of the vesicular glutamate transporter *Slc17a8* (*VGluT3*), the water channel *Aqp4*, the  
703 voltage-dependent potassium channel *Kcna3* (Kv1.3) and the voltage and calcium sensitive  
704 chloride channel *Ano1* (*TMEM16a*). The developmental profile of expression for *Slc17a8* mRNA  
705 did not show changes between P0 and any age tested in the CN, IC, ACX, and VCX (one-way  
706 ANOVA P=0.4894, P=0.4882, P=0.4543, P=0.7512 for CN, IC, ACX and VCX, respectively).  
707 In the pons, *Slc17a8* mRNA decreased between P0 and P15 in both LG groups (one-way  
708 ANOVA P=0.1447; multiple comparisons P=0.0126, P=0.0189 for low-LG and high-LG  
709 samples, respectively). The developmental profile of *Aqp4* mRNA expression in the CN showed  
710 increases between P0 and P7 in high-LG pups (one-way ANOVA P=0.0001; multiple  
711 comparisons test P=0.0402), between P0 and P15 in both LG groups (multiple comparisons test  
712 P=0.0012, P=0.0024 for low-LG and high-LG samples, respectively), and between P0 and P21 in  
713 both LG groups (multiple comparisons test P=0.0001, P=0.0001). In the pons, IC, ACX and  
714 VCX, there were consistent increases in *Aqp4* mRNA between P0 and P15 (one-way ANOVA  
715 P=0.0022, P=0.0010, P=0.0001, P=0.0001; multiple comparisons test P=0.0429, P=0.0248 for  
716 low-LG and high-LG samples in pons, respectively; multiple comparisons test P=0.0366,  
717 P=0.0079 for low-LG and high-LG samples in IC, respectively; multiple comparisons test

718 P=0.0030, P=0.0037 for low-LG and high-LG samples in ACX, respectively; multiple  
719 comparisons test P=0.0143, P=0.0090 for low-LG and high-LG samples in VCX, respectively),  
720 and between P0 and P21 (multiple comparisons test P=0.0006, P=0.0008 for low-LG and high-  
721 LG samples in pons, respectively; multiple comparisons test P=0.0003, P=0.0003 for low-LG  
722 and high-LG samples in IC, respectively; multiple comparisons test P=0.0001, P=0.0001 for  
723 low-LG and high-LG samples in ACX, respectively; multiple comparisons test P=0.0001,  
724 P=0.0001 for low-LG and high-LG samples in VCX, respectively). The developmental  
725 expression profile for *Kcna3* mRNA in the CN, pons, IC, and VCX, did not show changes  
726 between P0 and any age tested (one-way ANOVA P=0.2693, P=0.6529, P=0.2559, P=0.3509 for  
727 CN, pons, IC and VCX, respectively). There was an increase in the ACX between P0 and P21 in  
728 high-LG samples (one-way ANOVA P=0.1153; multiple comparisons test P=0.0093). The  
729 developmental expression profile of *Ano1* mRNA in the CN, pons, IC, ACX, and VCX, did not  
730 show any changes between P0 and any age tested (one-way ANOVA P=0.0111, P=0.5035,  
731 P=0.6650, P=0.4616, P=0.3545 in CN, pons, IC, ACX and VCX, respectively).

732  
733 **Figure 9B** shows the developmental expression profiles of *Panx1* and *Panx2* mRNAs. In the  
734 CN, pons, IC, ACX, and VCX, *Panx1* mRNA levels did not show any changes between P0 and  
735 any age tested (one-way ANOVA P=0.0237, P=0.1686, P=0.6542, P=0.8059, P=0.4887 for CN,  
736 pons, IC, ACX, and VCX, respectively). The developmental profile of *Panx2* mRNA did not  
737 show changes in auditory brainstem structures between P0 and any age tested (one-way ANOVA  
738 P=0.8168, P=0.5977, P=0.3431 for CN, pons, and IC, respectively). In contrast, in the ACX  
739 there were increases between P0 and P15 in high-LG pups (One way ANOVA P=0.0124;  
740 multiple comparisons test P=0.0272), and in VCX between P0 and P15 in both LG groups (one-  
741 way ANOVA P=0.0189; multiple comparisons test P=0.0226, P=0.0469 for low-LG and high-  
742 LG samples, respectively). Lastly, in the ACX and VCX, there were increases between P0 and  
743 P21 in both LG groups (multiple comparisons test P=0.0363, P=0.0076 in low-LG and high-LG

744 groups in ACX, respectively;  $P=0.0072$ ,  $P=0.0146$  in low-LG and high-LG groups in VCX,  
745 respectively).

746

747 **Figure 9C** shows developmental expression profiles for the mRNAs of gap junction subunits  
748 *Gjd2* (*Cx36*), *Gja4* (*Cx37*), *Gja5* (*Cx40*) and *Gjal* (*Cx43*). In the CN, pons, IC, and VCX, the  
749 developmental profile of *Gjd2* expression did not show changes between P0 and any age tested  
750 (one-way ANOVA  $P=0.4181$ ,  $P=0.6722$ ,  $P=0.8983$ ,  $P=0.9273$  for CN, pons, IC and VCX,  
751 respectively). In contrast, there were increases in the ACX between P0 and P7 in high-LG pups  
752 (one-way ANOVA  $P=0.0202$ ; multiple comparisons test  $P=0.0144$ ), between P0 and P15 in  
753 high-LG pups (multiple comparisons test  $P=0.0012$ ), and between P0 and P21 in both LG groups  
754 (multiple comparisons test  $P=0.0089$ ,  $P=0.0032$  for low-LG and high-LG samples, respectively).

755 The developmental profile of expression of *Gja4* mRNA did not show any changes in the CN,  
756 pons, IC, ACX, and VCX, between P0 and any age tested (one-way ANOVA  $P=0.0245$ ,  
757  $P=0.3028$ ,  $P=0.5237$ ,  $P=0.5951$ ,  $P=0.8205$  for CN, pons, IC, ACX and VCX, respectively).

758 Similarly, in the CN, pons, IC, ACX, and VCX, the expression levels of *Gja5* mRNA did not  
759 show any changes between P0 and any age tested (one-way ANOVA  $P=0.1392$ ,  $P=0.4419$ ,  
760  $P=0.4332$ ,  $P=0.1673$ ,  $P=0.0261$  for CN, pons, IC, ACX and VCX, respectively). In the CN, pons,  
761 and VCX, *Gjal* mRNA levels showed increases between P0 and P21 in both LG groups (one-  
762 way ANOVA  $P=0.0098$ ,  $P=0.0001$ ,  $P=0.0045$ ; multiple comparisons test  $P=0.0145$ ,  $P=0.0070$   
763 for low-LG and high-LG samples in CN, respectively;  $P=0.0001$ ,  $P=0.0001$  for low-LG and  
764 high-LG samples in pons, respectively;  $P=0.0099$ ,  $P=0.0006$  for low-LG and high-LG samples in  
765 VCX, respectively). In the IC, there was an increase between P0 and P21 in high-LG samples  
766 (one-way ANOVA  $P=0.0393$ ; multiple comparisons test  $P=0.0058$ ). Lastly, in the ACX, there  
767 were increases in both LG groups between P0 and P15 (one-way ANOVA  $P=0.0001$ ; multiple  
768 comparisons test  $P=0.0012$ ,  $P=0.0001$  for low-LG and high-LG samples, respectively), and



769 between P0 and P21 (multiple comparisons test  $P=0.0001$ ,  $P=0.0001$  for low-LG and high-LG  
770 samples, respectively).

771

772 In sum, the data in **Figure 9** shows evidence that the mRNA levels for several genes coding  
773 transmembrane proteins involved in cell signaling, water and ion diffusion did not change  
774 significantly between P0 and other ages examined. The exception was *Aqp4* mRNA, which  
775 showed consistent increased between P0 and P15, and between P0 and P21 in all brain regions  
776 examined.

777 DISCUSSION

778 In this study we hypothesized that differences in maternal licking and grooming (LG) during the  
779 first week of life are associated with differences in the timing of hearing onset. However, the  
780 results of this study do not support the hypothesis, and indicate that different levels of maternal  
781 LG are not sufficient to modulate hearing onset in the progeny (**Figures 2 and 3**). Nevertheless,  
782 this study provides three new findings concerning auditory development: First, it shows that  
783 early onset of functional responses correlates with a variable delay to eye opening (EO; **Figure**  
784 **4**); second, it adds new information on the relationship between the formation of the middle ear  
785 cavity and the threshold of functional responses during hearing onset (**Figures 5 and 6**); and  
786 third, it shows for the first time that mRNAs of the hypoxia-sensitive pathway and the *Bdnf*  
787 signaling pathway are regulated before and after the onset of hearing, respectively (**Figures 7-9**).  
788 Following is a discussion of the merits and limitations of these findings, including considerations  
789 for future studies.

790

791 *Variable delay between early hearing onset and EO*

792 A major caveat of the approach used in the present study is that we were not able to predict the  
793 developmental profile of individual litters based on maternal LG. However, we were surprised to  
794 find that litters reared by low-LG and high-LG dams showed a similar range of early and late  
795 auditory brainstem response (ABR) onset. This turned out to be an advantage, because by  
796 tracking pups during development we were able to measure the delay between ABR onset and  
797 EO in a relatively large number of litters. The onset of hearing for airborne sounds precedes EO,  
798 and this sequence of events occurs prenatally or postnatally in different vertebrate species. The  
799 finding that litters with an early ABR onset have a more variable delay to EO (**Figure 4**) is  
800 relevant in the context of recent studies that manipulated the timing of EO and measured its  
801 effects on the development of membrane and synaptic properties of primary auditory cortex  
802 neurons in gerbils, and of synaptic properties of primary visual cortex neurons in Long-Evans

803 rats (Mowery et al., 2016; Tatti et al., 2017). We propose that a better understanding of the  
804 relationship between hearing onset and the delay to EO will be useful to study cross modal  
805 experience-dependent plasticity between visual and auditory systems in rodents. Studies are  
806 needed to characterize the signaling pathways that influence the development of feed-forward  
807 and feedback mechanisms between ACX and VCX in animals with early and late hearing onset  
808 (Budinger et al., 2006; Mowery et al., 2016; Pan et al., 2018).

809

810 *Relationship between development of the auditory periphery and development of sensorineural*  
811 *responses from the inner ear*

812 Combined functional and structural analyses from this study showed that cavity formation in the  
813 middle ear correlated with the type of sensorineural responses tracked in animals of different  
814 ages. We found that within a range of air volume from 15 mm<sup>3</sup> to 40 mm<sup>3</sup>, ABRs had very  
815 elevated click intensity thresholds and relatively simple waveforms (**Figures 5 and 6**). For  
816 example, short latency potentials (SLPs) predominated over wave I responses at P12, and SLPs  
817 gradually waned as wave I responses increased in amplitude at P13 (**Figure 6**). Our results have  
818 confirmed and expanded on the previous findings of Blatchley, Cooper and Coleman, who  
819 described similar short latency responses to tone pips in ether-anesthetized P12 Sprague-Dawley  
820 rat pups (referred as summing potentials in their Figure 2: Blatchley, Cooper and Coleman,  
821 1987). Additionally, it is puzzling to us that at P12 SLPs were observed without wave I  
822 responses, and that wave I responses were observed without subsequent ABR wave components  
823 II-V. Given the accumulating evidence that hair cells and neurons along the entire auditory  
824 system are functionally connected and active prior to hearing onset in different vertebrate species  
825 (Lippe, 1994; Gummer and Mark, 1994; Jones et al., 2007; Sonntag et al., 2009; Tritsch et al.,  
826 2010; Johnson et al., 2012; Babola et al., 2018; Corns et al., 2018), it is reasonable to propose  
827 that the functional changes observed in this study could reflect the contribution of conductive  
828 development to increased sensitivity (Saunders, Doan and Cohen, 1993), and the suppressive

829 effects of isoflurane anesthesia on auditory function (Ruebhausen, Brozoski and Bauer, 2012;  
830 Bielefeld, 2014; Sheppard, Zhao, and Salvi, 2018). Future studies are needed to address how  
831 functional parameters of early sensory responses are affected by the state of the animal. This will  
832 require implementation of innovative methods to track structural and functional changes in non-  
833 anesthetized pups as they grow during postnatal development.

834

### 835 *Postnatal changes in gene expression of signaling pathways*

836 The first postnatal weeks represent a sequence of sensitive periods when expression of genes  
837 involved in cellular proliferation, migration, differentiation, synaptogenesis, myelination,  
838 apoptosis, and neuroplasticity are regulated temporally and regionally in the CNS. The onset of  
839 ABRs and EO represent developmental stages in which auditory and visual experience can affect  
840 the above cellular processes in sensory pathways. In this study we found evidence that the  
841 hypoxia-sensitive pathway and the *Bdnf* pathway are regulated before and after the onset of  
842 hearing, respectively.

843

844 The hypoxia-sensitive pathway regulates gene expression by a negative feedback mechanism  
845 that is sensitive to a reduction in O<sub>2</sub> partial pressure (i.e., hypoxia). O<sub>2</sub> sensing is mediated by the  
846 products of *Egln* paralogue expression that interact with hypoxia-inducible factors coded by  
847 *Hif1a* and *Epas1* to target them for degradation in normoxic conditions. During hypoxic  
848 conditions *Egln*/*Hif* interactions decrease, reducing *Hif* degradation and increasing *Hif* stability  
849 that enables the transcriptional activation of the erythropoietin gene by *Epas1*, and the  
850 transcriptional regulation of genes encoding glycolytic enzymes by *Hif1a* (reviewed in Lappin  
851 and Lee, 2019). In this study we found that *Egln1* (*Phd2*) mRNA was down regulated in auditory  
852 brain regions before and after the onset of hearing and EO, while mRNAs for *Hif1a*, *Epas1*,  
853 *Egln2* and *Egln3* did not change, or increased at ages posterior to hearing onset (**Figure 8B**).  
854 This finding is intriguing to us and raises several questions for future studies: First, do cells that

855 down regulate *Egln1* increase Hif activity? What causes down regulation of *Egln1* mRNA? What  
856 are the consequences of activating or disrupting the hypoxia-sensitive pathway during  
857 development of auditory brain regions? We propose that a first step to answer these questions  
858 will require mapping the localization of *Hif1a/Epas1* and *Egln1-3* mRNA and protein to specific  
859 cell types throughout the auditory system.

860

861 The Bdnf signaling pathway is involved in neuronal survival, cell growth, and differentiation via  
862 activation of its tyrosine kinase receptor Ntrk2, which in turn can modulate several signaling  
863 pathways including Akt/PI3K, Jak/STAT, NF- $\kappa$ B, UPAR/UPA, Wnt/ $\beta$ -catenin, and VEGF  
864 (Tajbakhsh et al., 2017). Studies in primary auditory cortex (ACX) and primary visual cortex  
865 (VCX) of rats and a mouse model of fragile X have shown that Bdnf signaling is regulated by  
866 sensory experience (Bozzi et al., 1995; Berardi, Pizzorusso and Maffei, 2000; Wang et al., 2017;  
867 Kulinich et al., 2019). In this study, we found a significant increase in mRNAs for *Ntrk2*, *Nfkb1*,  
868 *Akt2*, and *Wnt7a* in the ACX and VCX after hearing onset and EO (**Figures 7 and 8C**; although  
869 *Wnt7a* did not change in VCX). Furthermore, changes in mRNAs for *Ntrk2* and *Nfkb1* in the  
870 ACX were significantly different between pups reared by low-LG and high-LG dams at P21.  
871 These results expand previous findings that maternal care strongly modulates brain Bdnf levels  
872 in rodents (Branchi et al., 2013; Liu et al., 2000), and implicate maternal LG in experience-  
873 dependent development of functional responses in primary auditory cortex (de Villers-Sidani and  
874 Merzenich, 2011).

875

876 Lastly, in this study we found evidence of mRNA upregulation of alternative signaling pathways  
877 involving *Jun*, *Akt1*, and *Sort1* in subcortical auditory brain regions during a stage that coincides  
878 with the maturation of auditory thresholds and the end of the critical period for frequency tuning  
879 (Adise et al., 2014; de Villers-Sidani and Merzenich, 2011). Altogether, these results indicate a  
880 robust range of auditory periphery development and eye opening in Wistar rat pups that

881 experience variation in maternal backgrounds. Consistent with this interpretation, there is a  
882 robust change in brain gene expression before hearing onset of *Egln1*, which codes for a crucial  
883 component of the hypoxia sensitive pathway. In addition, the results of this study implicate  
884 maternal LG in the expression of molecular factors involved in experience-dependent plasticity,  
885 neural signaling and transcriptional control in subcortical and cortical sensory brain regions of  
886 the progeny. Despite previous findings that maternal LG is increased in adoptive Wistar rat dams  
887 (Maccari et al., 1995), and that massage treatment during the sensitive period before EO  
888 accelerates development of visually evoked potentials in Long-Evans rats (Guzzeta et al., 2009),  
889 it is unlikely that increased physical stimulation through LG can explain the effects of maternal  
890 separation on ABR and middle ear development reported previously in Wistar rat pups (Adise et  
891 al., 2014).

892 REFERENCES

893 Adise S, Saliu A, Maldonado N, Khatri V, Cardoso L, Rodríguez-Contreras A (2014) Effect of  
894 maternal care on hearing onset induced by developmental changes in the auditory periphery. *J*  
895 *Neurosci* 34(13): 4528-4533.

896

897 Babola TA, Li S, Gribizis A, Lee BJ, Issa JB, Wang HC, Crair MC, Bergles DE (2018)  
898 Homeostatic control of spontaneous activity in the developing auditory system. *Neuron* 99(3):  
899 511-524.

900

901 Barha CK, Pawluski JL, Galea LA (2007) Maternal care affects male and female offspring  
902 working memory and stress reactivity. *Physiol Behav* 92(5): 939-950.

903

904 Berardi N, Pizzorusso T, Maffei L (2000) Critical periods during sensory development. *Curr*  
905 *Opin Neurobiol* 10(1): 138-145.

906

907 Bielefeld EC (2014) Influence of dose and duration of isoflurane anesthesia on the auditory  
908 brainstem response in the rat. *Int J Audiol* 53: 250-258.

909

910 Blatchely BJ, Cooper WA, Coleman JR (1987) Development of auditory brainstem response to  
911 tone pip stimuli in the rat. *Brain Res* 429: 75-84.

912

913 Bogaerts S, Clements JD, Sullivan JM, Oleskevich S (2009) Automated threshold detection for  
914 auditory brainstem responses: comparison with visual estimation in a stem cell transplantation  
915 study. *BMC Neurosci* 10: 104.

916

- 917 Bozzi Y, Pizzorusso T, Cremisi F, Rossi FM, Barsacchi G, Maffei L (1995) Monocular  
918 deprivation decreases the expression of messenger RNA for brain-derived neurotrophic factor in  
919 the rat visual cortex. *Neuroscience* 69(4): 133-1144.
- 920
- 921 Branchi I, Curley JP, D'Andrea I, Cirulli F, Champagne FA, Alleva E (2013) Early interactions  
922 with mother and peers independently build adult social skills and shape BDNF and oxytocin  
923 receptor brain levels. *Psychoneuroendocrinol* 38: 522-532.
- 924
- 925 Budinger E, Heil P, Hess A, Scheich H (2006) Multisensory processing via early cortical stages:  
926 connections of the primary auditory cortical field with other sensory systems. *Neuroscience* 143:  
927 1065-1083.
- 928
- 929 Cameron N, Del Corpo A, Diorio J, McAllister K, Sharma S, Meaney MJ (2008) Maternal  
930 programming of sexual behavior and hypothalamic-pituitary-gonadal function in the female rat.  
931 *PLoS One* 3(5): e2210.
- 932
- 933 Careaga M, Murai T, Bauman MD (2017) Maternal immune activation and autism spectrum  
934 disorders: From rodents to nonhuman and human primates. *Biol Psychiatry* 81(5): 391-401.
- 935
- 936 Champagne FA, Francis DD, Mar A, Meaney MJ (2003) Variations in maternal care in the rat as  
937 a mediating influence for the effects of environment on development. *Physiol Behav* 79(3): 359-  
938 371.
- 939
- 940 Corns LF, Johnson SL, Roberts T, Ranatunga KM, Hendry A, Ceriani F, Safieddine S, Steel KP,  
941 Forge A, Petit C, Furness DN, Kros CJ, Marcotti W (2018) Mechanotransduction is required for



942 establishing and maintaining mature inner hair cells and regulating efferent innervation. Nat

943 Comm 9(1): 4015.

944

945 Curley JP, Champagne FA (2016) Influence of maternal care on the developing brain:

946 mechanisms, temporal dynamics and sensitive periods. Front Neuroendocrinol 40: 52-66.

947

948 de Villers-Sidani E, Merzenich MM (2011) Lifelong plasticity in the rat auditory cortex: Basic

949 mechanisms and role of sensory experience. In Green AM, Chapman E, Kalaska JF, Lepore F,

950 Editors: Prog Brain Res 191: 119-131.

951

952 Francis D, Diorio J, Liu D, Meaney MJ (1999) Nongenomic transmission across generations of

953 maternal behavior and stress responses in the rat. Science 286: 1155-1158.

954

955 González-Mariscal G, Melo AI (2017) Bidirectional effects of mother-young contact on the

956 maternal and neonatal brains. Adv Exp Med Biol 1015: 97-116.

957

958 Gummer AW, Mark RF (1994) Patterned neural activity in brain stem auditory areas of a

959 prehearing mammal, the tammar wallaby *Macropus eugenii*. Neuroreport 5: 685-688.

960

961 Guzzetta A, Baldini S, Bancalè A, Baroncelli L, Ciucci F, Ghirri P, Putignano E, Sale A, Viegi

962 A, Berardi N, Boldrini A, Cioni G, Maffei L (2009) Massage accelerates brain development and

963 the maturation of visual function. J Neurosci 29: 6042-6051.

964

965 Hancock SD, Menard JL, Olmstead MC (2005) Variations in maternal care influence

966 vulnerability to stress-induced binge eating in female rats. Physiol Behav 85(4): 430-439.

967

968 Johnson SL, Kennedy HJ, Holley MC, Fettiplace R, Marcotti W (2012) The resting transducer  
969 current drives spontaneous activity in prehearing mammalian cochlear inner hair cells. *J*  
970 *Neurosci* 32(31): 10479-10483.

971

972 Jones TA, Leake PA, Snyder RL, Stakhovskaya O, Bonham B (2007) Spontaneous discharge  
973 patterns in cochlear spiral ganglion cells before the onset of hearing in cats. *J Neurophysiol* 98:  
974 1898-1908.

975

976 Kulinich AO, Reinhard SM, Rais M, Lovelace JW, Scottt V, Binder DK, Razak KA, Ethell IM  
977 (2019) Beneficial effects of sound exposure on auditory cortex development in a mouse model of  
978 fragile X syndrome. *Neurobiol Dis* 134: 104622.

979

980 Lappin TR, Lee FS (2019) Update on mutations in the HIF: EPO pathway and their role in  
981 erythrocytosis. *Blood Rev* 37: 100590.

982

983 Lippe WR (1994) Rhythmic spontaneous activity in the developing avian auditory system. *J*  
984 *Neurosci* 14: 1486-1495.

985

986 Liu D, Diorio J, Tanenbaum B, Caldji C, Francis D, Freedman A, Sharma S, Pearson D, Plotsky  
987 PM, Meaney MJ (1997) Maternal care, hippocampal glucocorticoid receptors, and hypothalamic-  
988 pituitary-adrenal responses to stress. *Science* 277: 1659-1662.

989

990 Liu D, Diorio J, Day JC, Francis DD, Meaney MJ (2000) Maternal care, hippocampal  
991 synaptogenesis and cognitive development in rats. *Nature Neurosci* 3: 799-806.

992

- 993 Maccari S, Piazza PV, Kabbaj M, Barbazanges A, Simon H, Le Moal M (1995) Adoption  
994 reverses the long-term impairment in glucocorticoid feedback induced by prenatal stress. *J*  
995 *Neurosci* 15: 110-116.  
996  
997 Menard JL, Hakvoort RM (2007) Variations of maternal care alter offspring levels of  
998 behavioural defensiveness in adulthood: evidence for a threshold model. *Behav Brain Res*  
999 176(2): 302-313.  
1000  
1001 Mowery TM, Kotak VC, Sanes DH (2016) The onset of visual experience gates auditory cortex  
1002 critical periods. *Nat Commun* 7: 10416.  
1003  
1004 Mulder JJ, Kuijpers W, Peters TA, Tonnaer EL, Ramaekers FC (1998) Development of the  
1005 tubotympanum in the rat. *Laryngoscope* 108: 1846-1852.  
1006  
1007 Pan P, Zhou Y, Fang F, Zhang G, Ji Y (2018) Visual deprivation modifies oscillatory activity in  
1008 visual and auditory centers. *Anim Cells Sys (Seoul)* 22: 149-156.  
1009  
1010 Parent CI, Meaney MJ (2008) The influence of natural variations in maternal care on play  
1011 fighting in the rat. *Dev Psychobiol* 50(8): 767-776.  
1012  
1013 Rothman JS, Silver RA (2018) NeuroMatic: An integrated open-source software toolkit for  
1014 acquisition, analysis and simulation of electrophysiological data. *Front Neuroinform* 12: 14.  
1015  
1016 Ruebhausen MR, Brozoski TJ, Bauer CA (2012) A comparison of the effects of isoflurane and  
1017 ketamine anesthesia on auditory brainstem response (ABR) thresholds in rats. *Hear Res* 287: 25-  
1018 29.

1019

1020 Sakhai SA, Kriegsfeld LJ, Francis DD (2011) Maternal programming of sexual attractivity in  
1021 female Long Evans rats. *Psychoneuroendocrinology* 36(8): 1217-1225.

1022

1023 Salmaso N, Jablonska B, Scafidi J, Vaccarino FM, Gallo V (2014) Neurobiology of premature  
1024 brain injury. *Nat Neurosci* 17(3):341-346.

1025

1026 Saunders JC, Doan DE, Cohen YE (1993) The contribution of middle-ear sound conduction to  
1027 auditory development. *Comp Biochem Physiol Comp Physiol* 106: 7-13.

1028

1029 Sheppard AM, Zhao D-L, Salvi R (2018) Isoflurane anesthesia suppresses distortion product  
1030 otoacoustic emissions in rats. *J Otol* 13: 59-64.

1031

1032 Sonntag M, Englitz B, Kopp-Scheinflug C, Rubsamen R (2009) Early postnatal development of  
1033 spontaneous and acoustically evoked discharge activity of principal cells of the medial nucleus  
1034 of the trapezoid body: an in vivo study in mice. *J Neurosci* 29(30): 9510-9520.

1035

1036 Tajbakhsh A, Mokhtari-Zaer A, Rezaee M, Afzaljavan F, Rivandi M, Hassanian SM, Ferns GA,  
1037 Pasdar A, Avan A (2017) Therapeutic potentials of BDNF-TrkB in breast cancer; current status  
1038 and perspectives. *J Cell Biochem* 118: 2502-2515.

1039

1040 Tatti R, Swanson OK, Lee MSE, Maffei A (2017) Layer-specific developmental changes in  
1041 excitation and inhibition in rat primary visual cortex. *eNeuro* 4(6).

1042

- 1043 Tritsch NX, Rodríguez-Contreras A, Crins TT, Wang HC, Borst JGG, Bergles DE (2010)  
1044 Calcium action potentials in hair cells pattern auditory neuron activity before hearing onset. *Nat*  
1045 *Neurosci* 13(9): 1050-1052.  
1046  
1047 Walker CD, Xu Z, Rochford J, Johnston CC (2008) Naturally occurring variations in maternal  
1048 care modulate the effects of repeated neonatal pain on behavioral sensitivity to thermal pain in  
1049 the adult offspring. *Pain* 140(1): 167-176.  
1050  
1051 Wang Y, Ou X, Liu Y, Lu H (2017) Auditory deprivation modifies the expression of brain-  
1052 derived neurotrophic factor and tropomyosin receptor kinase B in the rat auditory cortex. *J Otol*  
1053 12: 34-40.  
1054  
1055 Weaver IC, Cervoni N, Champagne FA, D'Alessio AC, Sharma S, Seckl JR, Dymov S, Szyf M,  
1056 Meaney MJ (2004) Epigenetic programming by maternal behavior. *Nat Neurosci* 7: 847-854.

1057 FIGURE LEGENDS

1058 **Figure 1. Experimental approach.** **A**, The percent of pups with an auditory brainstem response  
1059 (ABR) or eye opening (EO) in a litter increases as a function of age. Fitting such data to equation  
1060 1 determines an  $A_{50}$  value, the age at which 50% of pups in a litter show an ABR or EO. In this  
1061 study we test the hypothesis that variation in maternal licking and grooming (LG) is associated  
1062 with pup's early (dashed line a) and late (continuous line b) sensory development profiles. **B**,  
1063 Four maternal selection experiments were performed during spring and summer seasons (2  
1064 replicates per season, with cohorts of 40 dams per experiment). After dams gave birth (P0)  
1065 maternal behavior was scored daily from P1 to P6 (n=135 dams). ABRs were tracked daily in all  
1066 pups from seventeen selected litters between P10 and P15, and at P21. EO was tracked daily  
1067 between P10 and P21 (n=199 pups). **C**, After behavioral scoring and selection between P1 and  
1068 P6, correlative ABR and micro-CT X-ray tomography measurements were obtained from two  
1069 low-LG litters (n=14 pups) and from two high-LG litters (n=15 pups) between P10 and P15  
1070 (indicated by arrowheads). **D**, Brain samples were obtained at different ages for gene expression  
1071 analysis, prior and after behavioral scoring from three low-LG litters and four high-LG litters at  
1072 P7, P15, and at P21 (indicated by arrowheads). Three litters were used to collect pups at P0,  
1073 which was defined as a baseline for expressing fold changes in gene expression at other ages  
1074 (n=3 pups per age per LG condition).

1075 **Figure 2. Variation in licking and grooming (LG) across different dam cohorts. A,** Box  
1076 plots of six-day average LG scores from cohorts analyzed in the spring and summer of two  
1077 consecutive years. Each circle represents one dam. Asterisks indicate P values obtained by  
1078 Holm's Sidak's multiple comparisons test, \*\*=0.0021, \*\*\*=0.0001 and 0.0005, \*\*\*\*<0.0001. **B,**  
1079 Daily LG scores for seven low-LG dams selected from spring and summer cohorts (continuous  
1080 lines and dashed lines, respectively). **C,** Daily LG scores for ten high-LG dams selected from  
1081 spring and summer cohorts (continuous lines and dashed lines, respectively). **D,** Six-day average  
1082 LG scores for low LG and high-LG dams selected from spring and summer cohorts. Each circle  
1083 represents one dam. Asterisks indicate P values obtained by Tukey's multiple comparisons test,  
1084 \*=0.0249, \*\*=0.0035 and 0.0088, \*\*\*\*<0.0001. n.s.=not significant.

1085 **Figure 3. Timing of auditory brainstem response (ABR) onset and eye opening (EO) in the**  
1086 **offspring of selected dams. A,** Plots of percent pups with ABR wave I at different ages from  
1087 seven low-licking and grooming (low-LG) litters were fit to equation 1. **B,** Plots of percent pups  
1088 with ABR wave I at different ages from ten high-licking and grooming (high-LG) litters were fit  
1089 to equation 1. **C,** Plots of percent pups with EO at different ages from seven low-LG litters were  
1090 fit to equation 1. **D,** Plots of percent pups with EO at different ages from ten high-LG litters were  
1091 fit to equation 1. **E,** Violin plots of  $A_{50}$  values obtained from fits of equation 1 to developmental  
1092 data of percent pups with ABR or EO. **F,** Violin plots of rate coefficient  $k$  values obtained from  
1093 fits of equation 1 to developmental data of percent pups with ABR or EO. Asterisks indicate  
1094 significant differences between medians: \* indicates P value = 0.0172; \*\* indicate P values =  
1095 0.0055 and 0.0027; \*\*\* indicates P value =0.0005; Dunn's multiple comparisons test; n.s.=not  
1096 significant. Continuous lines represent fits to spring litters; dashed lines represent fits to summer  
1097 litters.



1098 **Figure 4. Delay between auditory brainstem response (ABR) onset and eye opening (EO).**  
1099 **A,** Scatter plot of  $A_{50}$  values show the relationship between EO and ABR onset in low-licking  
1100 and grooming (low-LG) and high-licking and grooming (high-LG) litters. **B,** Scatter plot of rate  
1101 coefficient  $k$  values show the relationship between EO and ABR development in selected low-  
1102 LG and high-LG litters. Magenta symbols represent low-LG data; blue symbols represent high-  
1103 LG data. Black line in A and B represents the identity line.

1104 **Figure 5. Relationship between development of the middle cavity and wave 1 auditory**  
1105 **brainstem (ABR) thresholds. A,** Top, developmental series of micro-CT X ray scans of pups  
1106 from a low-licking and grooming (low-LG) litter. White indicates bone, grey is soft tissue and  
1107 black is air. Bottom, 3D rendering of segmented bone (gray) and air (purple) contrast obtained  
1108 from tomographic data. **B,** Air volume measured at different ages in pups from two low-LG  
1109 (magenta) and two high-licking and grooming (high-LG) litters (blue). Note that every symbol  
1110 represents one pup and that similar symbols represent pups from the same litter. Continuous and  
1111 dotted color lines are fits of equation 1 to the data. **C,** Relationship between ABR wave I  
1112 thresholds and air volume in the middle ear cavity. Magenta circles and triangles represent pups  
1113 from low-LG litters (n = 25 pups); blue circles and triangles represent pups from high LG litters  
1114 (n = 26 pups). NR = non-responsive pups, defined by the absence of ABR wave I. Black line  
1115 represents the fit to a linear function between wave I thresholds and air volume with slope 2.5  
1116 dB/mm<sup>3</sup>. Symbols with white dots indicate data points included in the fit.

1117 **Figure 6. Identification of short latency potentials (SLPs) in combined auditory brainstem**  
1118 **response (ABR) and micro-CT X ray (micro-CT) experiments. A, C, E, Representative 3D**  
1119 rendering of three P12 pups with different volumes of air in the middle ear and external canal. **B,**  
1120 **D, F,** Corresponding ABR waveforms show the presence of a SLP in pups with air volumes of  
1121 24 mm<sup>3</sup> and 36 mm<sup>3</sup>, but not in the pup without middle ear and external ear cavities. ABR traces  
1122 in B, D and F correspond to click intensities shown in panel F. **G,** SLP thresholds as a function  
1123 of air volume. Black line represents the fit to a linear function between SLP thresholds and air  
1124 volume with slope 0.3 dB/mm<sup>3</sup>. Symbols with white dots indicate data points included in the fit.  
1125 **H,** Comparison of SLP thresholds and wave 1 thresholds for pups measured at P12 and P13.  
1126 Filled symbols represent pups used in combined ABR and micro-CT experiments. Open symbols  
1127 are littermates used solely in ABR experiments at P12. Asterisks indicate pups tracked from P12  
1128 to P13. Black dashed line in H is the identity line. Arrows in G and H indicate a pup that showed  
1129 ABR wave I but not a SLP.

1130 **Figure 7. Temporal expression profiles for genes involved in neural development and**  
1131 **plasticity. A,** Relative level of mRNA expression of neurotrophin genes BDNF, NGF and the  
1132 BDNF receptor TrkB. **B,** Relative level of mRNA expression for transcription factors c-Fos, c-  
1133 Jun, NFκB and Otx2. **C,** Relative level of mRNA expression for signaling effectors Akt1, Akt2,  
1134 and Sort 1. Data is plotted as fold change with respect to birth (P0). Magenta symbols represent  
1135 data from low-licking and grooming (low-LG) samples. Blue symbols represent data from high-  
1136 licking and grooming (high-LG) samples. Data represents mean ± sem (n=3 pups per age per LG  
1137 group). Asterisks represent statistically significant differences with respect to P0. Boxed data  
1138 represents statistically significant differences between low-LG and high-LG samples.  
1139 Alpha=0.05.

1140 **Figure 8. Temporal expression profiles for genes involved in oligodendrocyte development,**  
1141 **the hypoxia-sensitive pathway and the mTor/Wnt7 pathway. A,** Relative level of mRNA  
1142 expression of Olig2 and Mbp. **B,** Relative level of mRNA expression of Hif1a, Hif2a, and Phd  
1143 isoforms 1, 2 and 3. **C,** Relative level of mRNA expression of mTor, Wnt7a and Wnt7b.  
1144 Magenta symbols represent data from low-licking and grooming (low-LG) samples. Blue  
1145 symbols represent data from high-licking and grooming (high-LG) samples. Data represents  
1146 mean  $\pm$  sem (n=3 pups per age per LG group). Asterisks represent statistically significant  
1147 differences with respect to P0. Alpha=0.05.

1148 **Figure 9. Temporal expression profiles for genes involved in neural signaling. A,** Relative  
1149 level of mRNA expression of Vglut3, Aqp4, Kv1.3, and TMEM16a. **B,** Relative level of mRNA  
1150 expression of Panexin1 and Pannexin2. **C,** Relative level of mRNA expression of Cx36, Cx37,  
1151 Cx40 and Cx43. Magenta symbols represent data from low-licking and grooming (low-LG)  
1152 samples. Blue symbols represent data from high-licking and grooming (high-LG) samples. Data  
1153 represents mean  $\pm$  sem (n=3 pups per age per LG group). Asterisks represent statistically  
1154 significant differences with respect to P0. Alpha=0.05.

## FIGURES AND TABLES

FIGURE 1

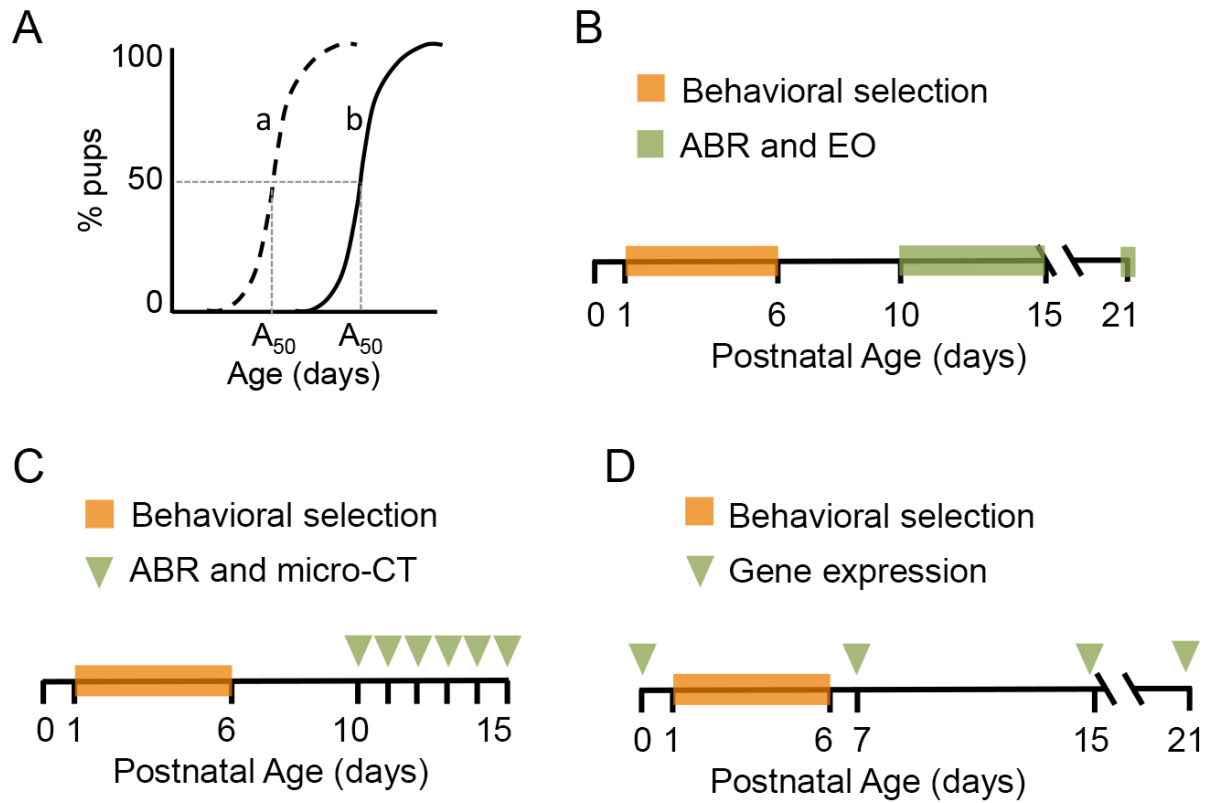

FIGURE 2

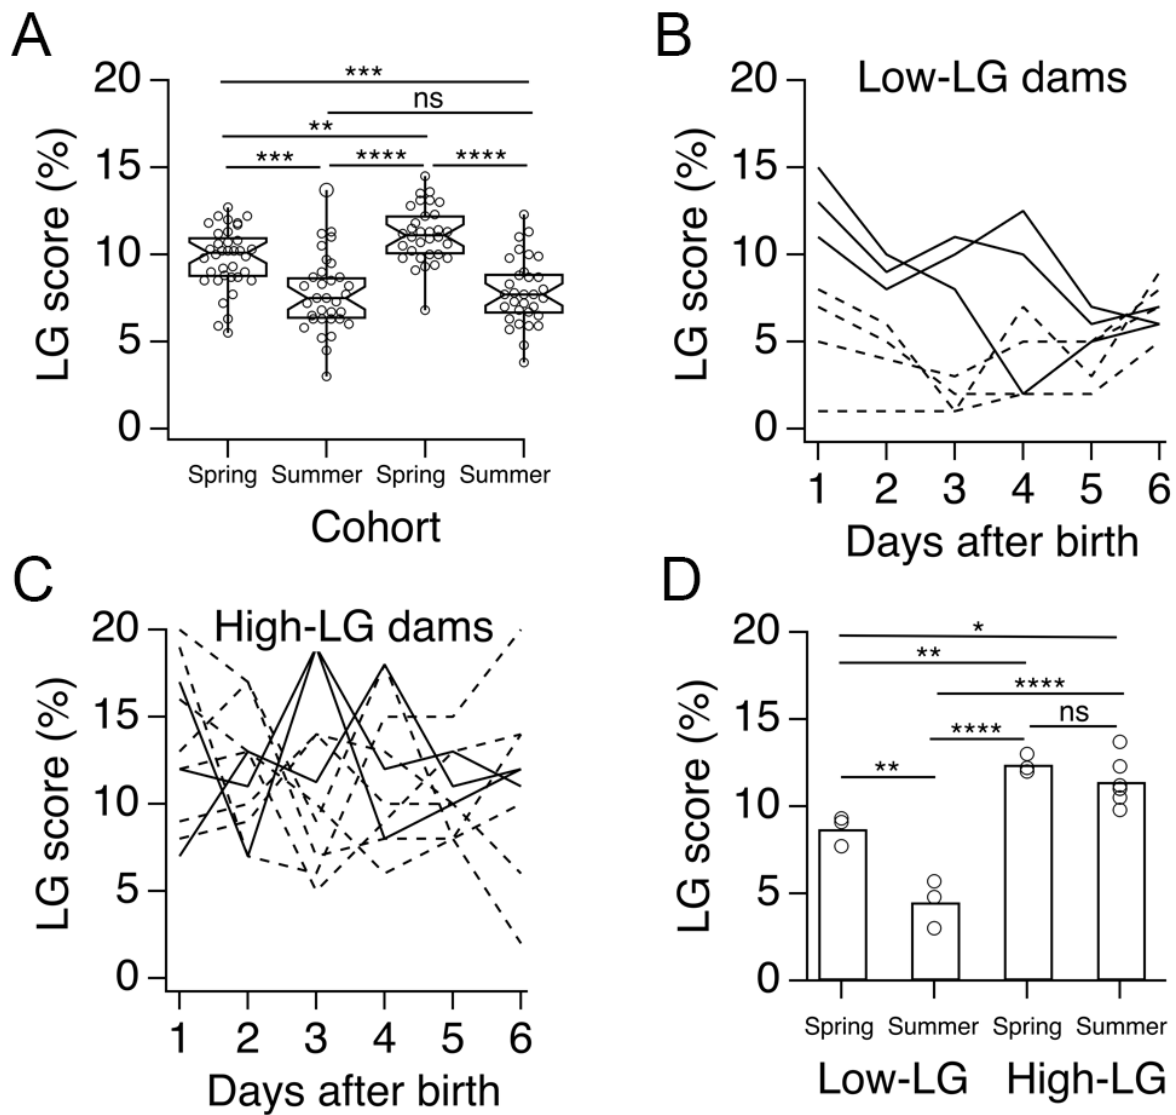



FIGURE 3

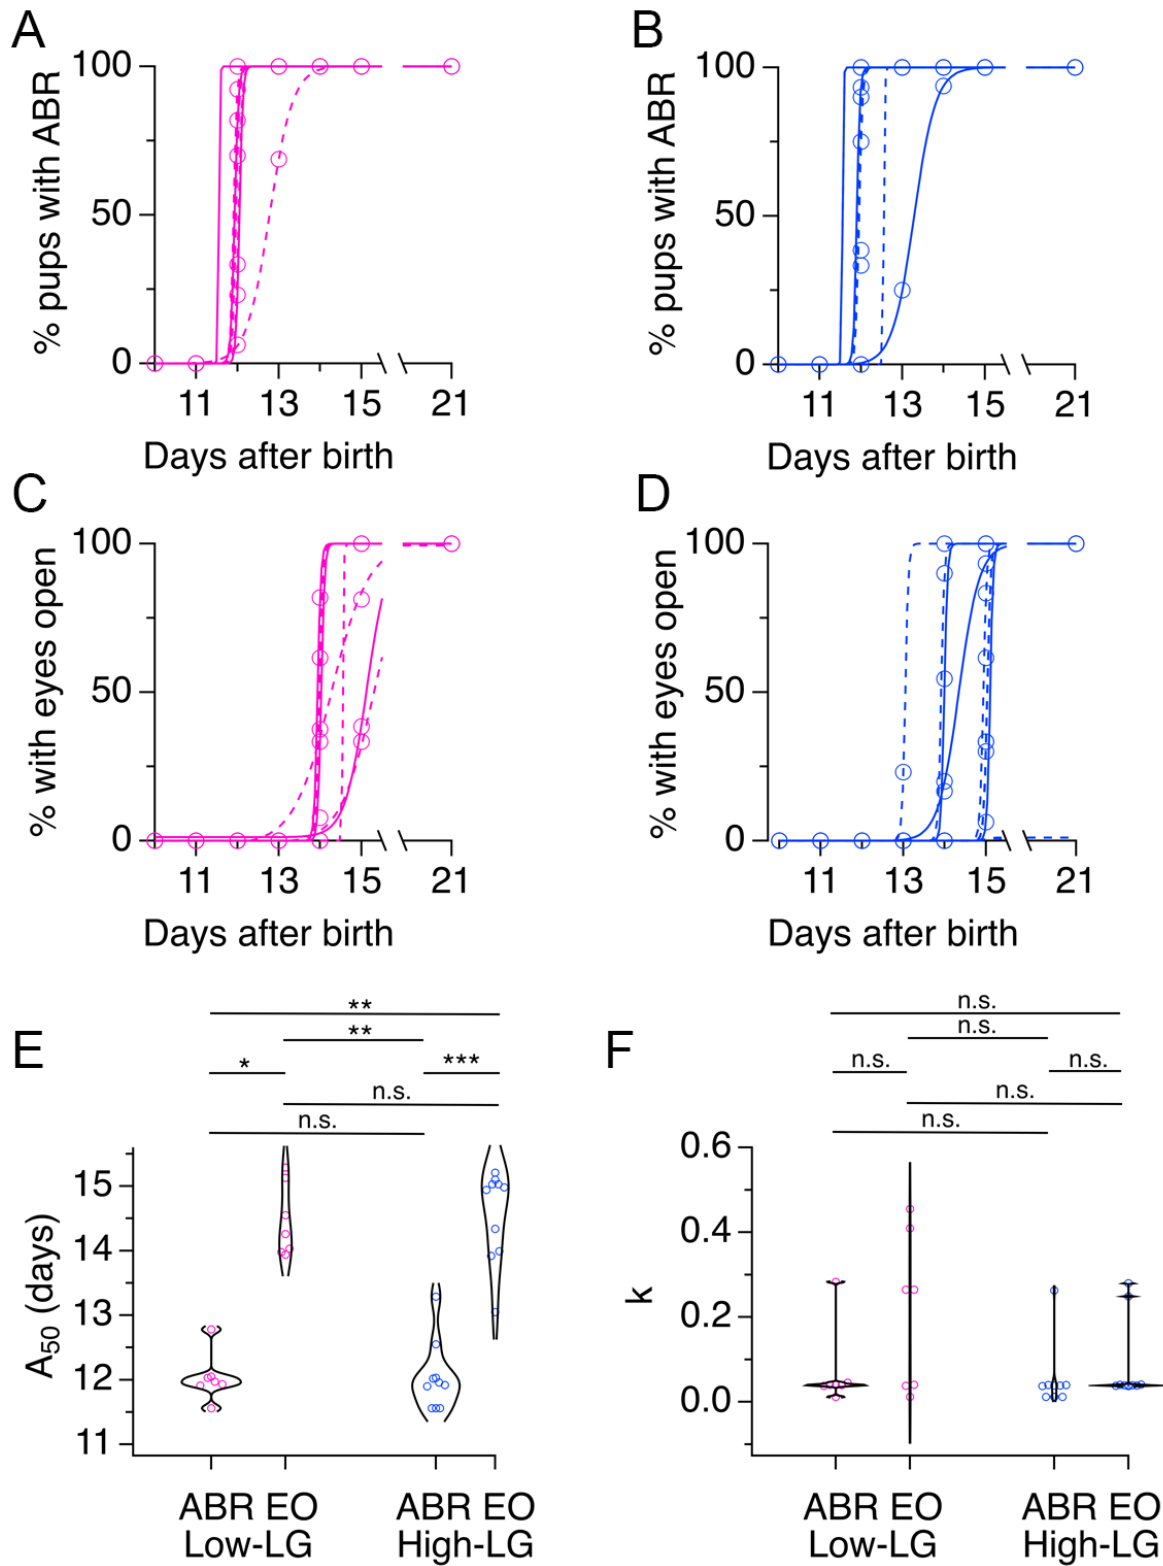

FIGURE 4

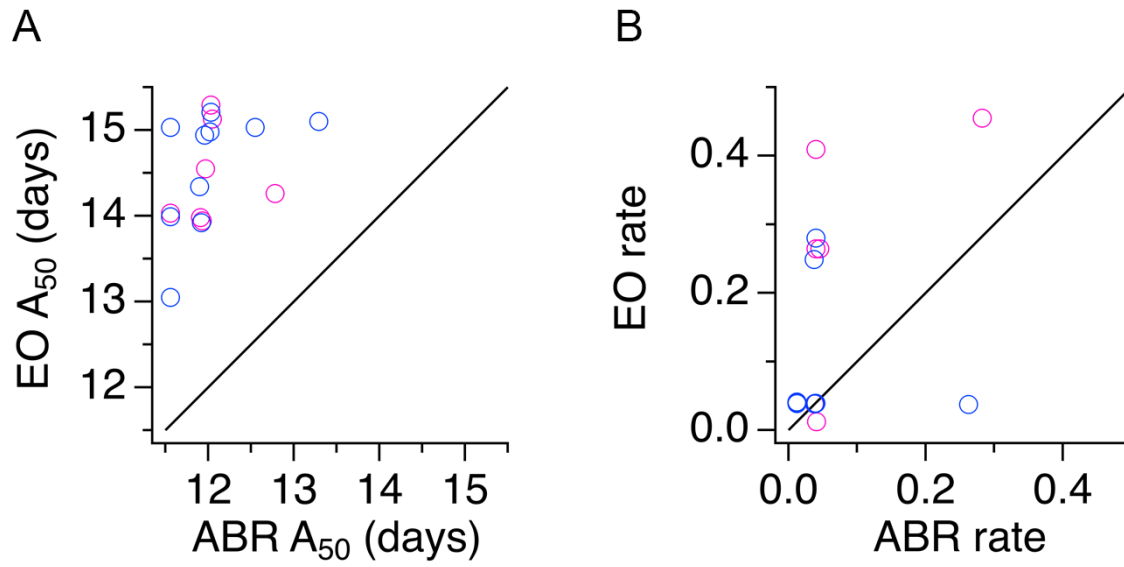

FIGURE 5

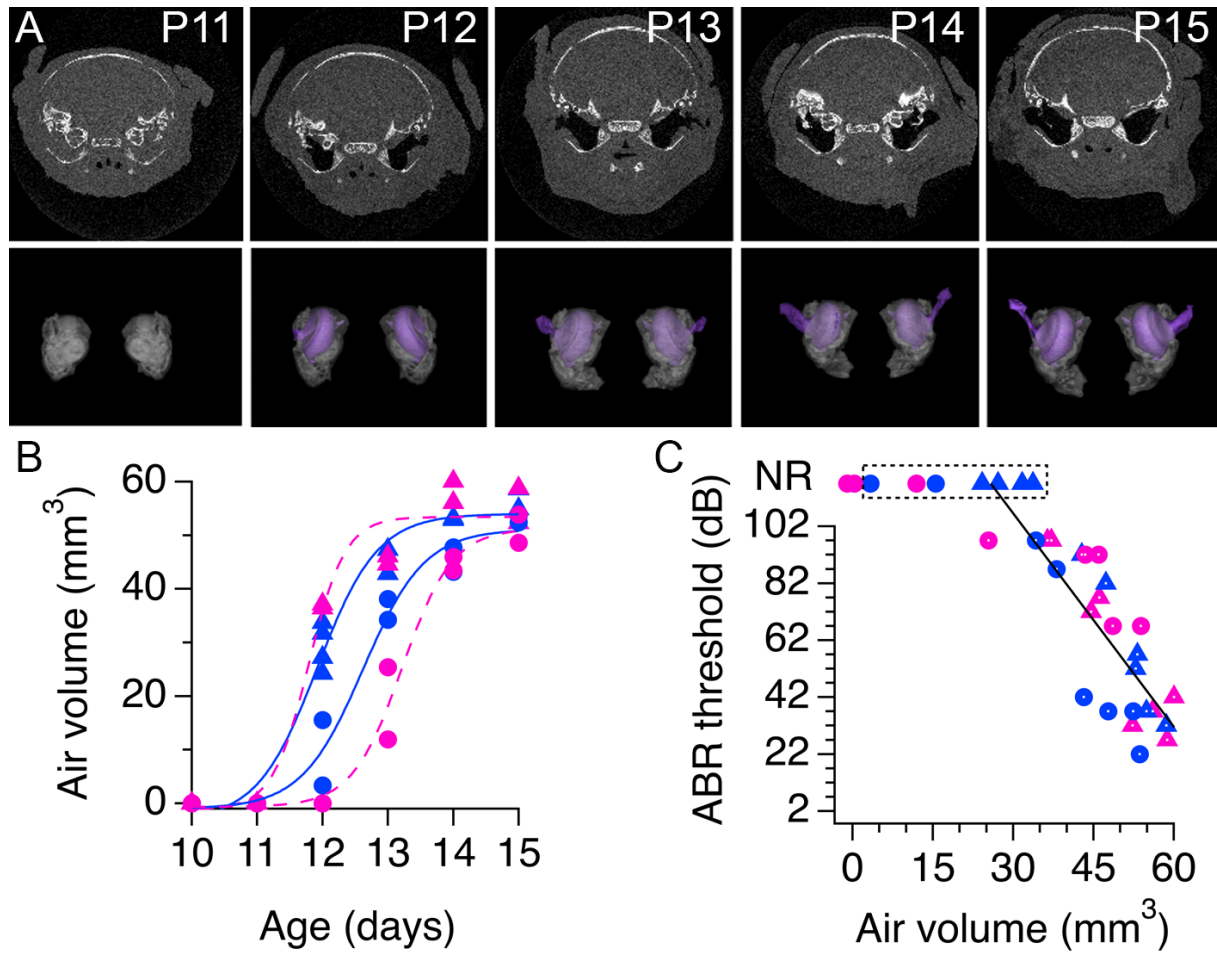

FIGURE 6

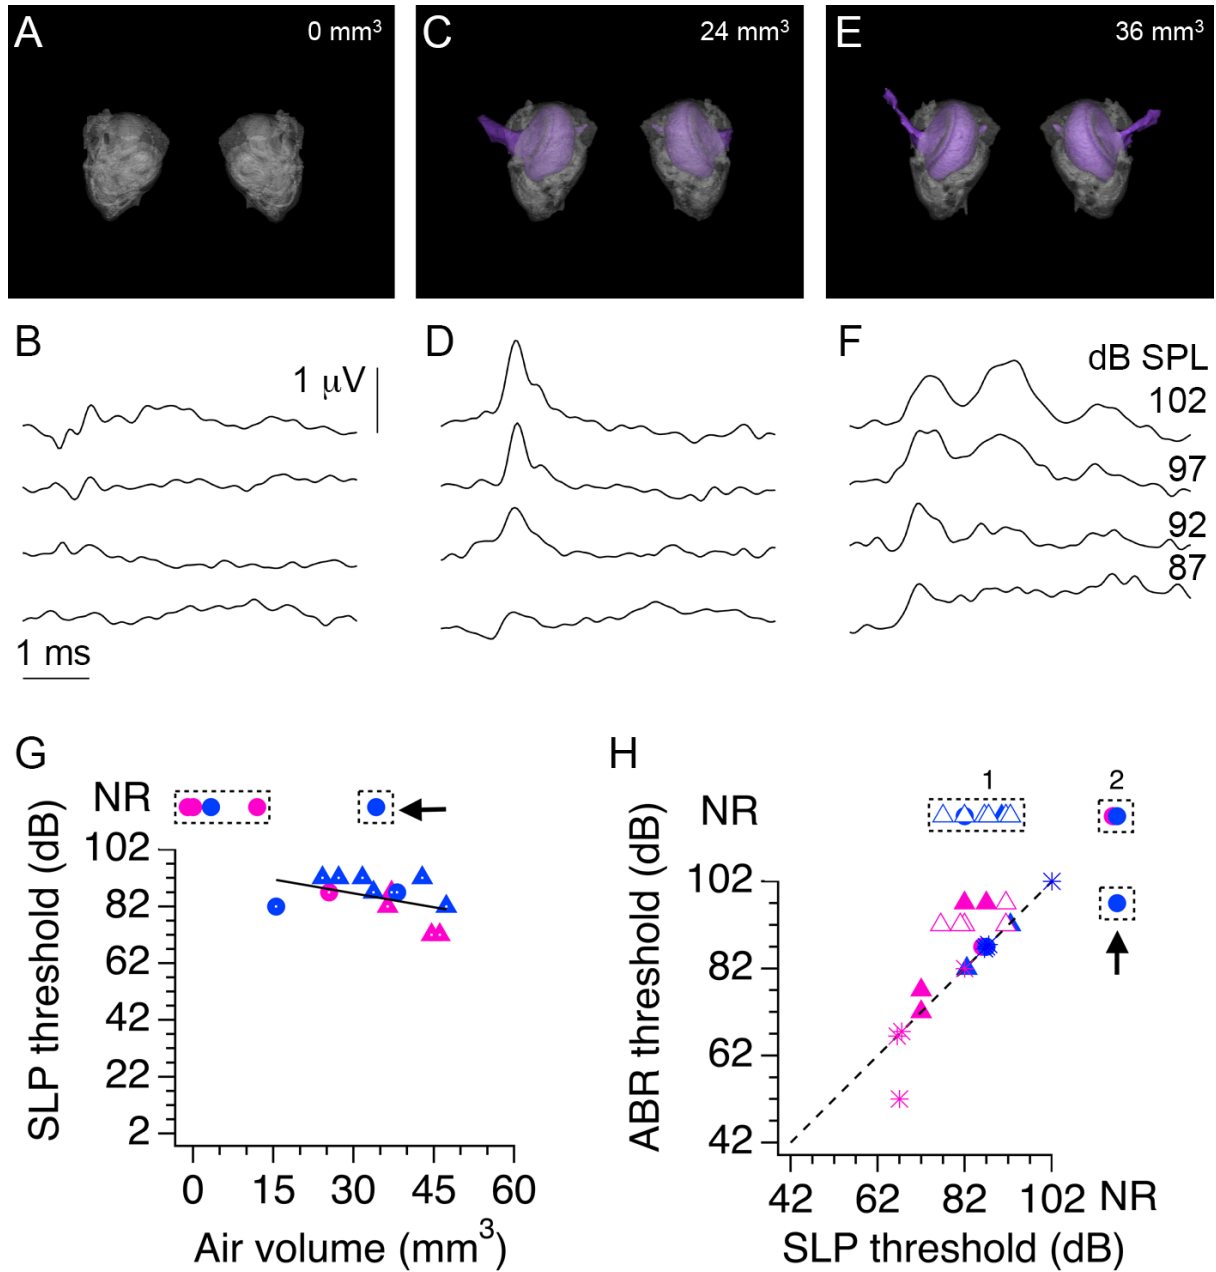

FIGURE 7

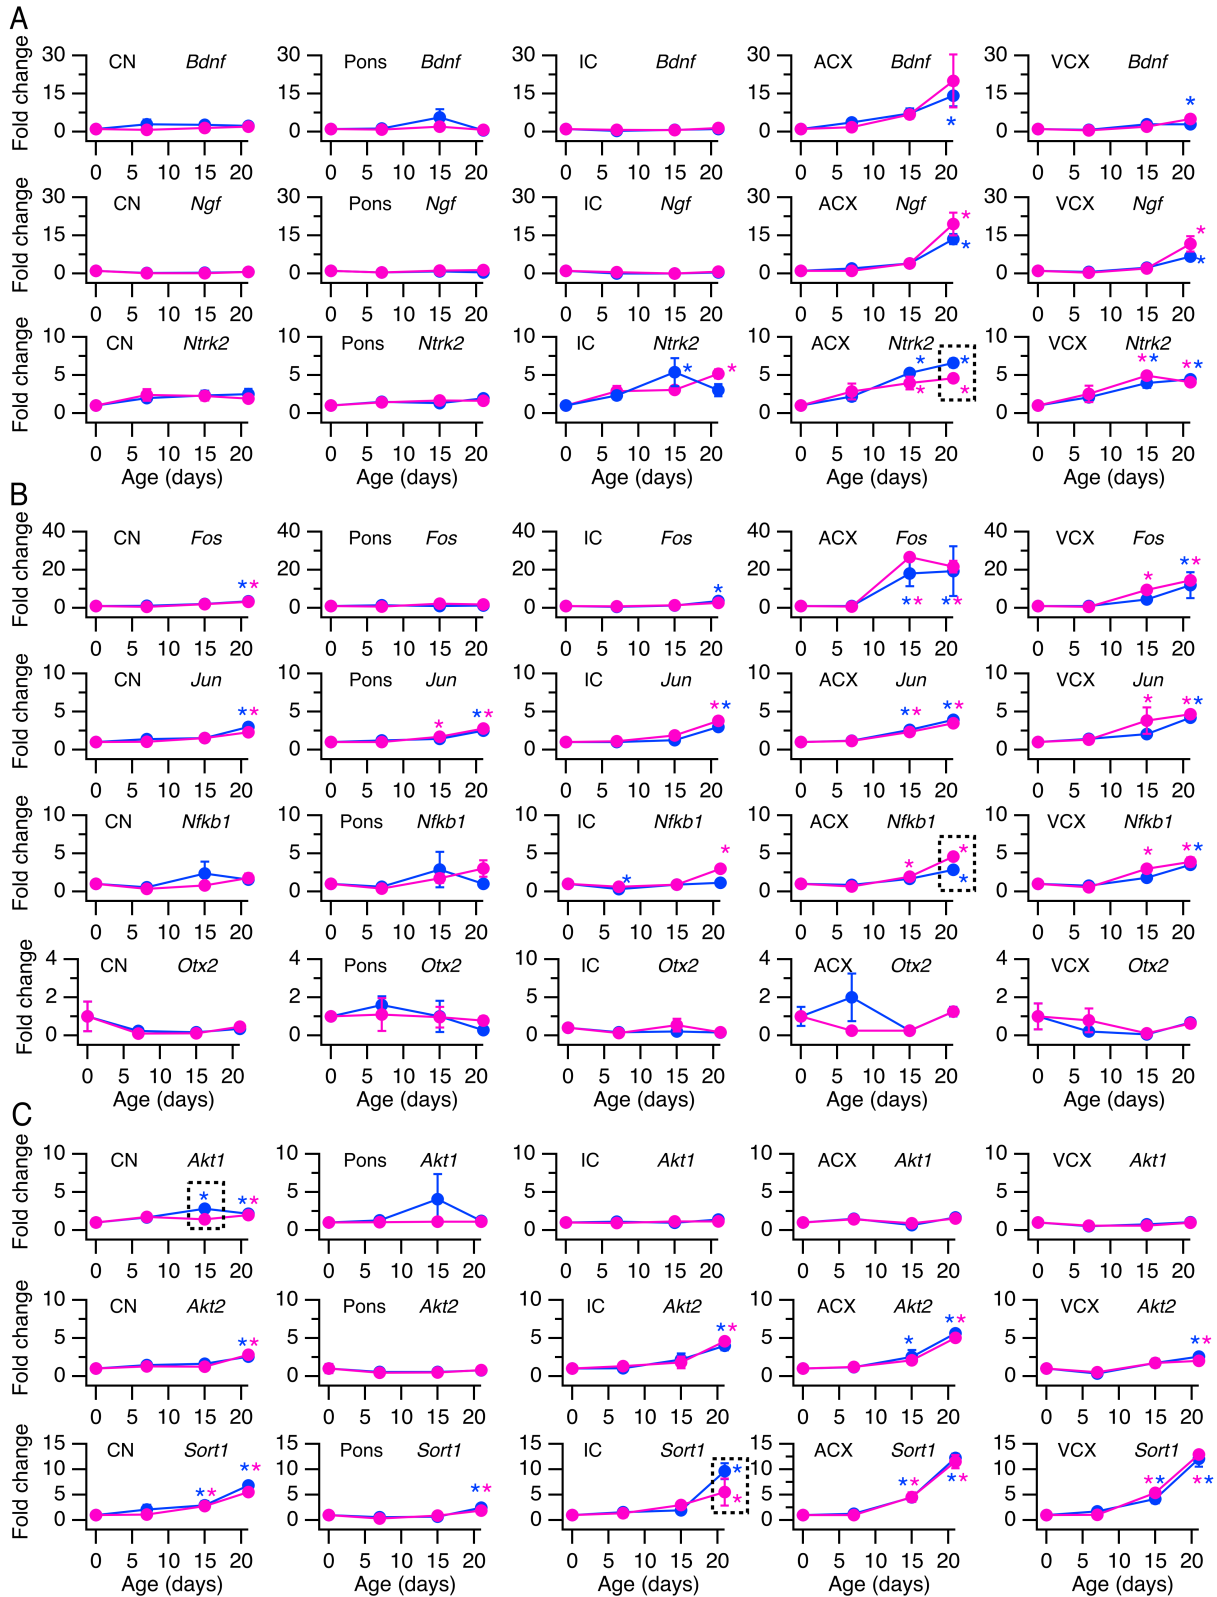

FIGURE 8

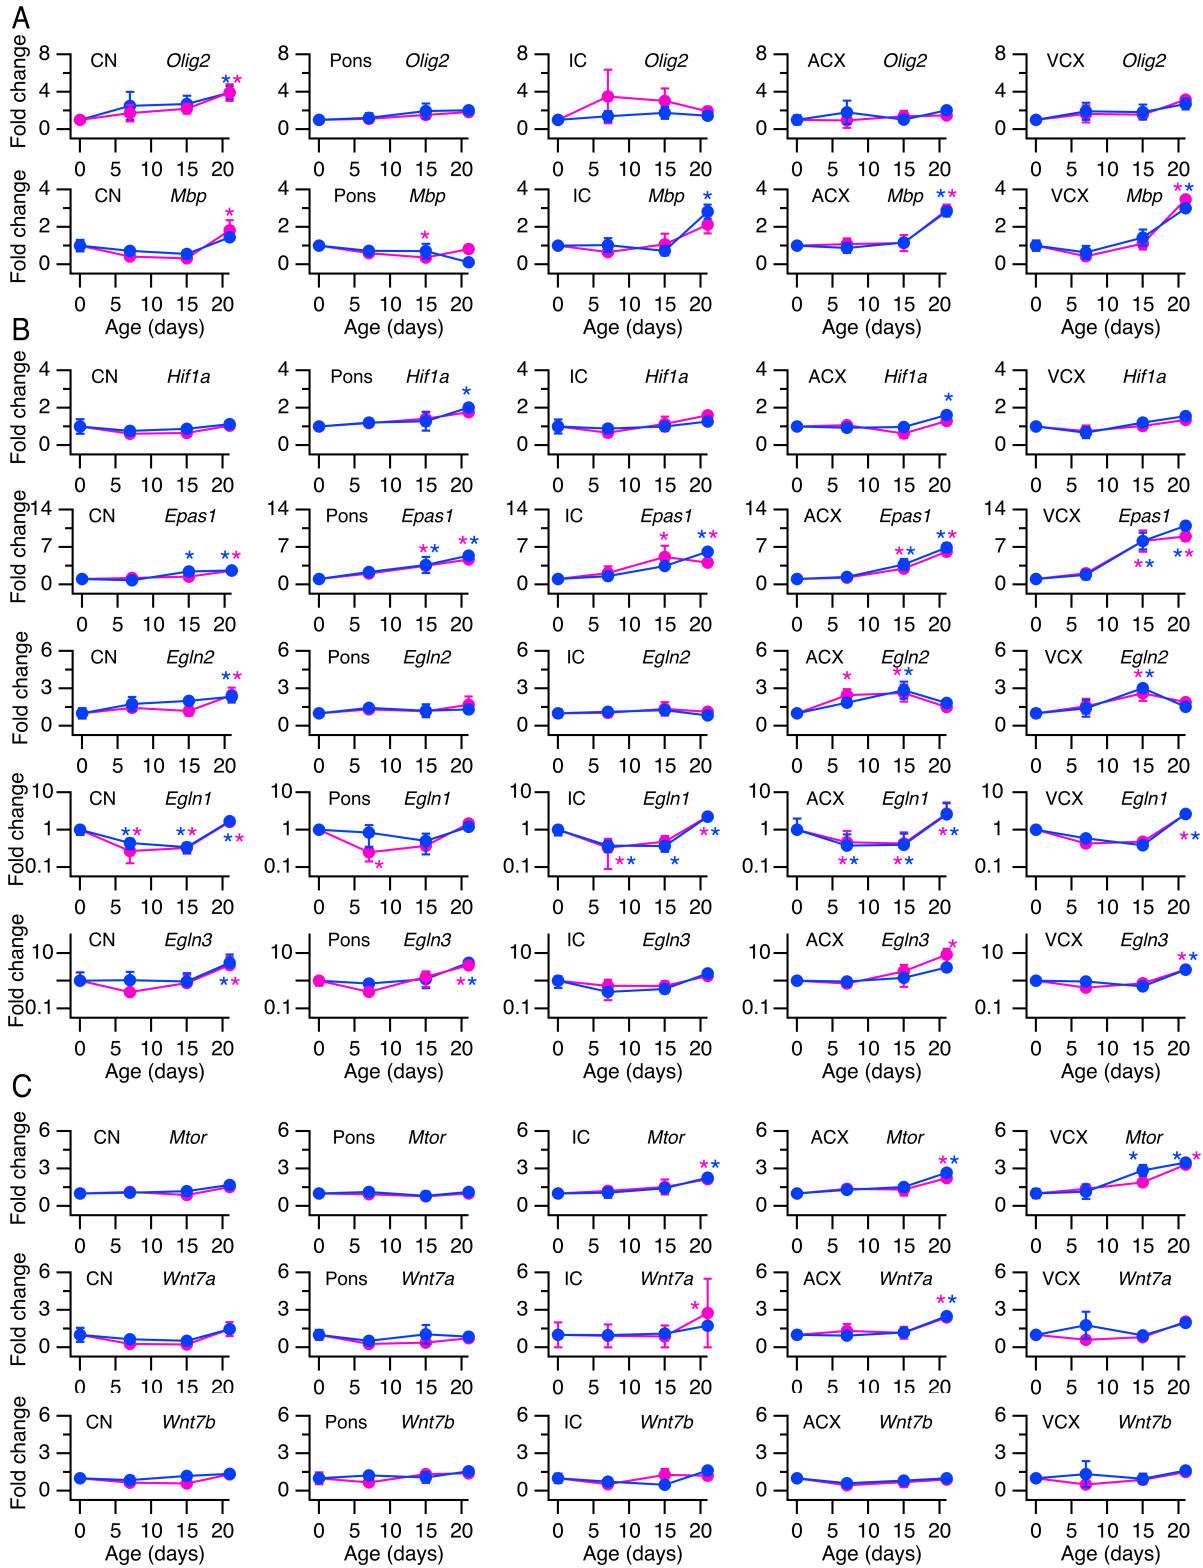

FIGURE 9

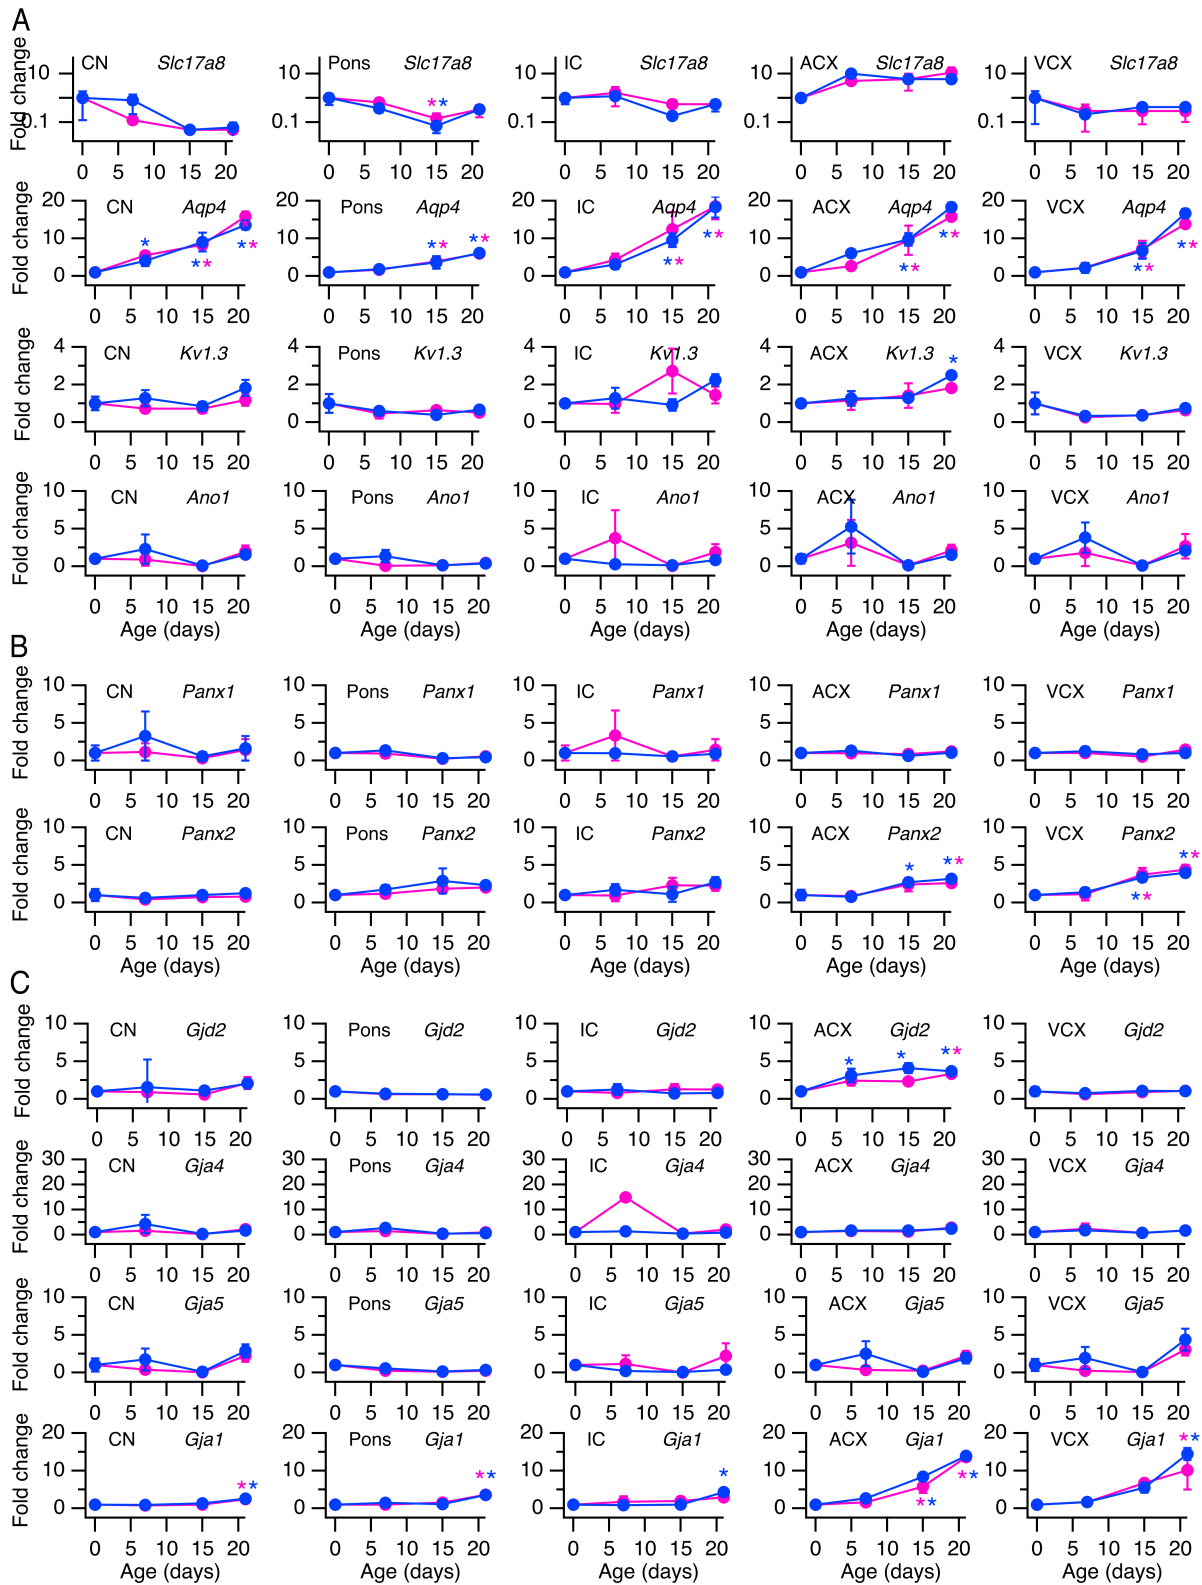

TABLE 1. List of primer pairs used for analysis of gene expression with qRT-PCR.

| Gene         | Gene ID | Sequence (5'-3') forward; reverse              |
|--------------|---------|------------------------------------------------|
| <i>Actb</i>  | 81822   | AAGACCTCTATGCCAACAC; TGATCTTCATGGTGCTAGTAGG    |
| <i>Bdnf</i>  | 24225   | GGAGACGAGATTTTAAGACAC; CCATAGTAAGGAAAAGGATGG   |
| <i>Ngf</i>   | 310738  | AAACTAGGCTCCCTGAAG; AGAACAACATGGACATTACG       |
| <i>Ntrk2</i> | 25054   | AATGGAGACTACACCCTAATG; GAGGGGATCTCATTACTTTTG   |
| <i>Fos</i>   | 314322  | AAAACCTGGAGTTTATTTTGGC; CACAGACATCTCCTCTGG     |
| <i>Jun</i>   | 24516   | AAAAGTGAAAACCTTGAAAGC; CGTGGTTCATGACTTTCTG     |
| <i>Nfkb1</i> | 81736   | AAAAACGAGCCTAGAGATTG; ACATCCTCTTCCTTGTCTTC     |
| <i>Otx2</i>  | 305858  | GAGAGGACTACTTTCACGAG; CGATTCTTAAACCATACCTGC    |
| <i>Akt1</i>  | 24185   | GGGGAATATATTAACCTGGC; GTCTTCATCAGCTGACATTG     |
| <i>Akt2</i>  | 25233   | GAGTCCTACAGAATACCAGG; AATCTCTGCACCATAAAAGC     |
| <i>Sort1</i> | 83576   | CTTTACCACCCATGTGAATG; TTTTGAAGGTTTCCCCAAG      |
| <i>Olig2</i> | 304103  | ATCGAATTCACATTCGGAAG; GAAAAAGATCATCGGGTTCTG    |
| <i>Mbp</i>   | 24547   | GAGAATTAGCATCTGAGAAGG; AAACACATCACTGTCTTCTG    |
| <i>Hif1a</i> | 29560   | GAAAGGATTACTGAGTTGATGG; CAGACATATCCACCTCTTTTTG |
| <i>Epas1</i> | 29452   | GATGACAGAATCTTGGAAGT; CACACATATCCTCCATGTTTG    |
| <i>Egln1</i> | 308913  | GAATCAGAACTGGGATGTAAAG; TTGGCATCAAATACCAGAC    |
| <i>Egln2</i> | 308457  | AAACTCAATTCATGAGCAGG; CTGAGGTGTTGAACAGAAAC     |
| <i>Egln3</i> | 54702   | TGGGGATCCTAATTATCCAG; TCCTGTCCCTCTCATTTAAC     |
| <i>Mtor</i>  | 56718   | AGAAATTTGATCAGGTGTGC; TTCCTTTTCCTTCTTGACAC     |
| <i>Wnt7a</i> | 114850  | ATCATCGTCATAGGAGAAGG; ATAATTGCATAGGTGAAGGC     |
| <i>Wnt7b</i> | 315196  | CATGAACCTTCACAACAATG; TTGTAATTCTCCTTGAGTAGG    |



|                |        |                                                |
|----------------|--------|------------------------------------------------|
| <i>Slc17a8</i> | 266767 | CCTGTCTATGCCATTATTGTG; AGAGACCCACCTTACTTATTG   |
| <i>Aqp4</i>    | 25293  | GAAAACCACTGGATATATTGGG; CAGAAGACATACTCGTAAAGTG |
| <i>Kcna3</i>   | 29731  | AACTTCAATTACTTCTACCACC; ACTTACTCAGAGTGGAGTTAC  |
| <i>Ano1</i>    | 309135 | GAAATCCTGAAGAGAACAACG; TTTACTTAGAAGGGCAGAGTC   |
| <i>Panx1</i>   | 315435 | CTTGACAAAGTCTATAACCGC; ATTAGGTGACTGGAGTTCTTC   |
| <i>Panx2</i>   | 362979 | AAACAGCAAGACTGAGAAG; TATAGGGATGCACATCCAAG      |
| <i>Gjd2</i>    | 50564  | AAATTTGTGACCCATCTCAG; AAAGTGTGTTAGGGCTAATG     |
| <i>Gja4</i>    | 25655  | AATTTGACCACCGAGGAG; CATACTGCTTCTTGGATGC        |
| <i>Gja5</i>    | 50563  | GTGTATATGTGTGTGTGTGC; AGGGCTCTTCTTTACCATTC     |
| <i>Gja1</i>    | 24392  | AAAACGTCTGCTATGACAAG; CACAGACACGAATATGATCTG    |
